# Supplementary material for: TaPR1 Interacts With TaTLP1 via the αIV Helix to Be Involved in Wheat Defense to Puccinia triticina Through the CAPE1 Motif
Source: Frontiers journal article supplement (doi:10.3389/fpls.2022.874654), 2022-05-26
Supplement: Data_Sheet_1.XLS [file Data_Sheet_1.XLS]

## Sheet: Sheet1
			A1	24.891	A4	30.7166	-5.82557	56.7116	56.6234		56.6234	95.2386	316.58	6.91596	11.1346	5.76306
			A2	24.3238	A5	30.4636	-6.13984	70.5142
			A3	24.8047	A6	30.219	-5.41428	42.6443											*
			B1	21.7266	B4	28.3778	-6.65128	100.516	95.2386
			B2	21.6789	B5	27.5469	-5.86805	58.4064
			B3	21.8227	B6	28.809	-6.98634	126.794
			C1	19.6018	C4	27.9743	-8.37253	331.422	316.58
			C2	18.849	C5	27.5446	-8.69557	414.598
			C3	19.7057	C6	27.3761	-7.67045	203.721
			D1	22.2726	D4	24.5926	-2.32004	4.99347	6.91596
			D2	21.9562	D5	24.8344	-2.87817	7.35216
			D3	22.3119	D6	25.3826	-3.07078	8.40226
			E1	19.9594	E4	22.51	-2.55058	5.85869	11.1346
			E2	19.9914	E5	23.6732	-3.6818	12.8331
			E3	20.0105	E6	23.8894	-3.87893	14.7121
			F1	20.6646	F4	23.7269	-3.06222	8.35254	5.76306
			F2	21.9017	F5	23.9898	-2.08803	4.25167
			F3	21.1062	F6	23.3342	-2.22803	4.68495
			A7	28.6778	A10	29.8927	-1.21494	2.32131	1.82013
			A8	28.8302	A11	29.2424	-0.412159	1.33068		TcLr19	56.6234	95.2386	316.58	6.91596	11.1346	5.76306
			A9	28.5077	A12	29.3625	-0.85471	1.80839		TC	1.82013	2.75899	2.95547	1.24446	0.611992	1.14809
			B7	22.2396	B10	23.079	-0.839388	1.78929	2.75899
			B8	20.5446	B11	22.1657	-1.6211	3.07609
			B9	20.7514	B12	22.5218	-1.77045	3.4116
			C7	24.4691	C10	23.4445	1.02462	0.491539	2.95547
			C8	23.4771	C11	23.6495	-0.172344	1.12689
			C9	21.4772	C12	24.3348	-2.85758	7.24798
			D7	23.8494	D10	24.2611	-0.411627	1.33018	1.24446
			D8	24.4841	D11	24.0598	0.42432	0.74519
			D9	23.3885	D12	24.118	-0.729454	1.65801
			E7	23.6189	E10	22.7129	0.906027	0.533653	0.611992
			E8	23.4224	E11	22.97	0.452362	0.730845
			E9	23.4048	E12	22.5975	0.807232	0.571477
			F7	23.6439	F10	23.2048	0.439199	0.737544	1.14809
			F8	23.0112	F11	23.7825	-0.771286	1.70679
			F9	23.1512	F12	23.1511	9.34601e-05	0.999935

## Sheet: Sheet3
描述
		个案数	平均值	标准 偏差	标准 错误	平均值的 95% 置信区间		最小值	最大值
						下限	上限
抗病	.00	3	56.6234	13.9352	8.04546	22.0065	91.2402	42.6443	70.5142
	24.00	3	95.2386	34.4978	19.9173	9.54148	180.936	58.4064	126.794
	48.00	3	316.58	106.219	61.3255	52.7178	580.443	203.721	414.598
	72.00	3	6.91596	1.74576	1.00791	2.57926	11.2527	4.99347	8.40226
	96.00	3	11.1346	4.66467	2.69315	-0.453063	22.7223	5.85869	14.7121
	120.00	3	5.76306	2.253	1.30077	0.166288	11.3598	4.25167	8.35254
	总计	18	82.0426	119.398	28.1423	22.6675	141.418	4.25167	414.598
感病	.00	3	1.82013	0.495421	0.286032	0.589432	3.05082	1.33068	2.32131
	24.00	3	2.75899	0.856378	0.49443	0.631633	4.88635	1.78929	3.4116
	48.00	3	2.95547	3.73097	2.15408	-6.31278	12.2237	0.491539	7.24798
	72.00	3	1.24446	0.462409	0.266972	0.0957741	2.39315	0.74519	1.65801
	96.00	3	0.611992	0.104653	0.0604216	0.352019	0.871965	0.533653	0.730845
	120.00	3	1.14809	0.50132	0.289437	-0.0972591	2.39344	0.737544	1.70679
	总计	18	1.75652	1.60727	0.378838	0.957244	2.5558	0.491539	7.24798
ANOVA
		平方和	自由度	均方	F	显著性
抗病	组间	216956	5	43391.2	20.5052	1.68506e-05
	组内	25393.3	12	2116.1
	总计	242349	17
感病	组间	13.1664	5	2.63329	1.02762	0.444289
	组内	30.7501	12	2.56251
	总计	43.9166	17
多重比较
因变量				平均值差值 (I-J)	标准 错误	显著性	95% 置信区间
							下限	上限
抗病	LSD	.00	24.00	-38.6153	37.5598	0.32418	-120.451	43.2204
			48.00	-259.95687*	37.5598	1.60246e-05	-341.793	-178.121
			72.00	49.7074	37.5598	0.210356	-32.1283	131.543
			96.00	45.4887	37.5598	0.249168	-36.347	127.324
			120.00	50.8603	37.5598	0.200651	-30.9754	132.696
		24.00	.00	38.6153	37.5598	0.32418	-43.2204	120.451
			48.00	-221.34158*	37.5598	7.33129e-05	-303.177	-139.506
			72.00	88.32269*	37.5598	0.0366112	6.48698	170.158
			96.00	84.10404*	37.5598	0.0448612	2.26833	165.94
			120.00	89.47559*	37.5598	0.0346226	7.63988	171.311
		48.00	.00	259.95687*	37.5598	1.60246e-05	178.121	341.793
			24.00	221.34158*	37.5598	7.33129e-05	139.506	303.177
			72.00	309.66426*	37.5598	2.75872e-06	227.829	391.5
			96.00	305.44562*	37.5598	3.17761e-06	223.61	387.281
			120.00	310.81717*	37.5598	2.65481e-06	228.981	392.653
		72.00	.00	-49.7074	37.5598	0.210356	-131.543	32.1283
			24.00	-88.32269*	37.5598	0.0366112	-170.158	-6.48698
			48.00	-309.66426*	37.5598	2.75872e-06	-391.5	-227.829
			96.00	-4.21865	37.5598	0.912428	-86.0544	77.6171
			120.00	1.15291	37.5598	0.976017	-80.6828	82.9886
		96.00	.00	-45.4887	37.5598	0.249168	-127.324	36.347
			24.00	-84.10404*	37.5598	0.0448612	-165.94	-2.26833
			48.00	-305.44562*	37.5598	3.17761e-06	-387.281	-223.61
			72.00	4.21865	37.5598	0.912428	-77.6171	86.0544
			120.00	5.37155	37.5598	0.888653	-76.4642	87.2073
		120.00	.00	-50.8603	37.5598	0.200651	-132.696	30.9754
			24.00	-89.47559*	37.5598	0.0346226	-171.311	-7.63988
			48.00	-310.81717*	37.5598	2.65481e-06	-392.653	-228.981
			72.00	-1.15291	37.5598	0.976017	-82.9886	80.6828
			96.00	-5.37155	37.5598	0.888653	-87.2073	76.4642
感病	LSD	.00	24.00	-0.938867	1.30703	0.486312	-3.78665	1.90892
			48.00	-1.13534	1.30703	0.402084	-3.98313	1.71244
			72.00	0.575665	1.30703	0.667451	-2.27212	3.42345
			96.00	1.20813	1.30703	0.373527	-1.63965	4.05592
			120.00	0.672037	1.30703	0.61647	-2.17575	3.51982
		24.00	.00	0.938867	1.30703	0.486312	-1.90892	3.78665
			48.00	-0.196474	1.30703	0.883009	-3.04426	2.65131
			72.00	1.51453	1.30703	0.269097	-1.33325	4.36232
			96.00	2.147	1.30703	0.126382	-0.700783	4.99479
			120.00	1.6109	1.30703	0.241369	-1.23688	4.45869
		48.00	.00	1.13534	1.30703	0.402084	-1.71244	3.98313
			24.00	0.196474	1.30703	0.883009	-2.65131	3.04426
			72.00	1.71101	1.30703	0.215023	-1.13678	4.55879
			96.00	2.34348	1.30703	0.0982005	-0.504308	5.19126
			120.00	1.80738	1.30703	0.191915	-1.04041	4.65516
		72.00	.00	-0.575665	1.30703	0.667451	-3.42345	2.27212
			24.00	-1.51453	1.30703	0.269097	-4.36232	1.33325
			48.00	-1.71101	1.30703	0.215023	-4.55879	1.13678
			96.00	0.63247	1.30703	0.637169	-2.21531	3.48025
			120.00	0.0963722	1.30703	0.942437	-2.75141	2.94416
		96.00	.00	-1.20813	1.30703	0.373527	-4.05592	1.63965
			24.00	-2.147	1.30703	0.126382	-4.99479	0.700783
			48.00	-2.34348	1.30703	0.0982005	-5.19126	0.504308
			72.00	-0.63247	1.30703	0.637169	-3.48025	2.21531
			120.00	-0.536098	1.30703	0.688914	-3.38388	2.31169
		120.00	.00	-0.672037	1.30703	0.61647	-3.51982	2.17575
			24.00	-1.6109	1.30703	0.241369	-4.45869	1.23688
			48.00	-1.80738	1.30703	0.191915	-4.65516	1.04041
			72.00	-0.0963722	1.30703	0.942437	-2.94416	2.75141
			96.00	0.536098	1.30703	0.688914	-2.31169	3.38388
*. 平均值差值的显著性水平为 0.05。
抗病							感病
时间		个案数	Alpha 的子集 = 0.05				时间		个案数	Alpha 的子集 = 0.05
			1	2						1
邓肯a	120.00	3	5.76306				邓肯a	96.00	3	0.611992
	72.00	3	6.91596					120.00	3	1.14809
	96.00	3	11.1346					72.00	3	1.24446
	.00	3	56.6234					.00	3	1.82013
	24.00	3	95.2386					24.00	3	2.75899
	48.00	3		316.58				48.00	3	2.95547
	显著性		0.0500703	1				显著性		0.130841
将显示齐性子集中各个组的平均值。							将显示齐性子集中各个组的平均值。
a. 使用调和平均值样本大小 = 3.000。							a. 使用调和平均值样本大小 = 3.000。
