# Supplementary material for: TaPR1 Interacts With TaTLP1 via the αIV Helix to Be Involved in Wheat Defense to Puccinia triticina Through the CAPE1 Motif
Source: Frontiers journal article supplement (doi:10.3389/fpls.2022.874654), 2022-05-26
Supplement: Data_Sheet_2.XLS [file Data_Sheet_2.XLS]

## Sheet: Sheet1
			A1	29.9712	A4	29.9912	-0.0200214	1.01397	1.03227		1.03227	19.6593	159.194	215.42	369.631	141.606
			A2	29.6858	A5	29.9888	-0.302952	1.23367			0.211186	2.11602	3.07687	0.258997	0.978664	0.338404
			A3	29.579	A6	29.3431	0.235864	0.849176
			B1	22.0115	B4	26.775	-4.76351	27.1619	19.6593
			B2	22.3766	B5	26.6791	-4.30249	19.7323
			B3	22.6068	B6	26.2018	-3.595	12.0838
			C1	18.0257	C4	25.6721	-7.64638	200.351	159.194
			C2	18.9885	C5	25.6429	-6.65446	100.738
			C3	18.12	C6	25.5835	-7.46347	176.494
			D1	19.9874	D4	27.2309	-7.2435	151.534	215.42
			D2	19.1167	D5	27.4405	-8.32376	320.406
			D3	19.6654	D6	27.111	-7.4456	174.32
			E1	20.5135	E4	28.9245	-8.41097	340.371	369.631
			E2	20.6182	E5	28.8724	-8.25415	305.314
			E3	20.1686	E6	29.0242	-8.85552	463.208
			F1	20.3937	F4	27.2131	-6.81944	112.942	141.606
			F2	20.311	F5	27.9833	-7.67231	203.983
			F3	20.881	F6	27.6344	-6.75347	107.894
			A7	33.7193	A10	31.603	2.11625	0.230645	0.211186
			A8	33.1036	A11	31.0061	2.0975	0.233663
			A9	33.9625	A12	31.3997	2.56278	0.169249
			B7	22.5418	B10	23.1975	-0.655672	1.57535	2.11602
			B8	22.5459	B11	23.4616	-0.915676	1.88645
			B9	22.2923	B12	23.8215	-1.5292	2.88625
			C7	21.3568	C10	23.0551	-1.69827	3.24512	3.07687
			C8	21.7991	C11	23.6962	-1.89708	3.72458
			C9	21.0698	C12	22.2467	-1.17691	2.26091
			D7	27.1026	D10	25.5047	1.59784	0.330371	0.258997
			D8	27.6014	D11	25.1091	2.49234	0.177718
			D9	27.0674	D12	25.1726	1.89485	0.268902
			E7	25.7728	E10	25.1845	0.588284	0.665134	0.978664
			E8	25.6521	E11	25.9571	-0.305023	1.23544
			E9	25.9375	E12	25.9877	-0.0502148	1.03542
			F7	24.2515	F10	22.6279	1.6236	0.324524	0.338404
			F8	24.884	F11	22.747	2.137	0.227352
			F9	24.0838	F12	22.9739	1.10987	0.463335

## Sheet: Sheet2
描述
		个案数	平均值	标准 偏差	标准 错误	平均值的 95% 置信区间		最小值	最大值
						下限	上限
抗病	.00	3	1.03227	0.192897	0.111369	0.55309	1.51145	0.849176	1.23367
	24.00	3	19.6593	7.53933	4.35283	0.9306	38.3881	12.0838	27.1619
	48.00	3	159.194	52.0109	30.0285	29.9919	288.396	100.738	200.351
	72.00	3	215.42	91.6318	52.9036	-12.2058	443.046	151.534	320.406
	96.00	3	369.631	82.9141	47.8705	163.661	575.601	305.314	463.208
	120.00	3	141.606	54.079	31.2225	7.26684	275.946	107.894	203.983
	总计	18	151.091	136.652	32.2091	83.1354	219.046	0.849176	463.208
感病	.00	3	0.211186	0.0363495	0.0209864	0.120889	0.301483	0.169249	0.233663
	24.00	3	2.11602	0.684939	0.39545	0.414535	3.8175	1.57535	2.88625
	48.00	3	3.07687	0.746198	0.430818	1.22321	4.93053	2.26091	3.72458
	72.00	3	0.258997	0.0768066	0.0443443	0.0681986	0.449795	0.177718	0.330371
	96.00	3	0.978664	0.289357	0.167061	0.25986	1.69747	0.665134	1.23544
	120.00	3	0.338404	0.118602	0.0684752	0.0437788	0.633029	0.227352	0.463335
	总计	18	1.16336	1.17039	0.275863	0.581337	1.74538	0.169249	3.72458
多重比较
因变量				平均值差值 (I-J)	标准 错误	显著性	95% 置信区间
							下限	上限
抗病	LSD	.00	24.00	-18.6271	48.2559	0.706249	-123.768	86.5135
			48.00	-158.16187*	48.2559	0.00660987	-263.302	-53.0213
			72.00	-214.38789*	48.2559	0.000803009	-319.528	-109.247
			96.00	-368.59867*	48.2559	6.01738e-06	-473.739	-263.458
			120.00	-140.57418*	48.2559	0.013006	-245.715	-35.4336
		24.00	.00	18.6271	48.2559	0.706249	-86.5135	123.768
			48.00	-139.53481*	48.2559	0.0135368	-244.675	-34.3943
			72.00	-195.76083*	48.2559	0.00159102	-300.901	-90.6203
			96.00	-349.97162*	48.2559	1.01131e-05	-455.112	-244.831
			120.00	-121.94713*	48.2559	0.0265609	-227.088	-16.8066
		48.00	.00	158.16187*	48.2559	0.00660987	53.0213	263.302
			24.00	139.53481*	48.2559	0.0135368	34.3943	244.675
			72.00	-56.226	48.2559	0.266592	-161.367	48.9145
			96.00	-210.43681*	48.2559	0.000926974	-315.577	-105.296
			120.00	17.5877	48.2559	0.721851	-87.5529	122.728
		72.00	.00	214.38789*	48.2559	0.000803009	109.247	319.528
			24.00	195.76083*	48.2559	0.00159102	90.6203	300.901
			48.00	56.226	48.2559	0.266592	-48.9145	161.367
			96.00	-154.21078*	48.2559	0.00769386	-259.351	-49.0702
			120.00	73.8137	48.2559	0.152032	-31.3268	178.954
		96.00	.00	368.59867*	48.2559	6.01738e-06	263.458	473.739
			24.00	349.97162*	48.2559	1.01131e-05	244.831	455.112
			48.00	210.43681*	48.2559	0.000926974	105.296	315.577
			72.00	154.21078*	48.2559	0.00769386	49.0702	259.351
			120.00	228.02449*	48.2559	0.000492471	122.884	333.165
		120.00	.00	140.57418*	48.2559	0.013006	35.4336	245.715
			24.00	121.94713*	48.2559	0.0265609	16.8066	227.088
			48.00	-17.5877	48.2559	0.721851	-122.728	87.5529
			72.00	-73.8137	48.2559	0.152032	-178.954	31.3268
			96.00	-228.02449*	48.2559	0.000492471	-333.165	-122.884
感病	LSD	.00	24.00	-1.90483*	0.35449	0.000167123	-2.6772	-1.13247
			48.00	-2.86569*	0.35449	3.37817e-06	-3.63805	-2.09332
			72.00	-0.0478113	0.35449	0.894948	-0.820179	0.724556
			96.00	-0.767478	0.35449	0.0512493	-1.53985	0.00488941
			120.00	-0.127218	0.35449	0.725923	-0.899586	0.645149
		24.00	.00	1.90483*	0.35449	0.000167123	1.13247	2.6772
			48.00	-.96085*	0.35449	0.018937	-1.73322	-0.188486
			72.00	1.85702*	0.35449	0.000208266	1.08465	2.62939
			96.00	1.13735*	0.35449	0.00751414	0.364987	1.90972
			120.00	1.77761*	0.35449	0.000301862	1.00525	2.54998
		48.00	.00	2.86569*	0.35449	3.37817e-06	2.09332	3.63805
			24.00	.96085*	0.35449	0.018937	0.188486	1.73322
			72.00	2.81788*	0.35449	4.01358e-06	2.04551	3.59024
			96.00	2.09821*	0.35449	7.04326e-05	1.32584	2.87058
			120.00	2.73847*	0.35449	5.36844e-06	1.9661	3.51084
		72.00	.00	0.0478113	0.35449	0.894948	-0.724556	0.820179
			24.00	-1.85702*	0.35449	0.000208266	-2.62939	-1.08465
			48.00	-2.81788*	0.35449	4.01358e-06	-3.59024	-2.04551
			96.00	-0.719667	0.35449	0.0651116	-1.49203	0.0527007
			120.00	-0.0794068	0.35449	0.826523	-0.851774	0.692961
		96.00	.00	0.767478	0.35449	0.0512493	-0.00488941	1.53985
			24.00	-1.13735*	0.35449	0.00751414	-1.90972	-0.364987
			48.00	-2.09821*	0.35449	7.04326e-05	-2.87058	-1.32584
			72.00	0.719667	0.35449	0.0651116	-0.0527007	1.49203
			120.00	0.64026	0.35449	0.0960221	-0.132108	1.41263
		120.00	.00	0.127218	0.35449	0.725923	-0.645149	0.899586
			24.00	-1.77761*	0.35449	0.000301862	-2.54998	-1.00525
			48.00	-2.73847*	0.35449	5.36844e-06	-3.51084	-1.9661
			72.00	0.0794068	0.35449	0.826523	-0.692961	0.851774
			96.00	-0.64026	0.35449	0.0960221	-1.41263	0.132108
*. 平均值差值的显著性水平为 0.05。
抗病							感病
时间		个案数	Alpha 的子集 = 0.05				时间		个案数	Alpha 的子集 = 0.05
			1	2	3					1	2	3
邓肯a	.00	3	1.03227				邓肯a	.00	3	0.211186
	24.00	3	19.6593					72.00	3	0.258997
	120.00	3		141.606				120.00	3	0.338404
	48.00	3		159.194				96.00	3	0.978664
	72.00	3		215.42				24.00	3		2.11602
	96.00	3			369.631			48.00	3			3.07687
	显著性		0.706249	0.170766	1			显著性		0.0671724	1	1
将显示齐性子集中各个组的平均值。							将显示齐性子集中各个组的平均值。
a. 使用调和平均值样本大小 = 3.000。							a. 使用调和平均值样本大小 = 3.000。
