# Supplementary material for: TaPR1 Interacts With TaTLP1 via the αIV Helix to Be Involved in Wheat Defense to Puccinia triticina Through the CAPE1 Motif
Source: Frontiers journal article supplement (doi:10.3389/fpls.2022.874654), 2022-05-26
Supplement: Data_Sheet_3.XLS [file Data_Sheet_3.XLS]

## Sheet: Sheet1
A1	36.9351	A4	29.3449	7.59025	0.00518927	0.0067372		0.0067372	0.0389276	0.0064233	0.0115026	0.00106005	0.00913118
A2	36.451	A5	29.2843	7.16671	0.00695992			0.0193118	0.0479453	0.045309	0.00539678	0.0173466	0.0210181
A3	36.156	A6	29.2014	6.95457	0.0080624
B1	26.1132	B4	21.9789	4.13428	0.0569454	0.0389276
B2	26.4262	B5	21.1952	5.23101	0.0266262
B3	26.1741	B6	21.2619	4.91218	0.0332113
C1	28	C4	20.3145	7.68546	0.00485789	0.0064233
C2	27.8663	C5	20.9116	6.95475	0.00806144
C3	28.1082	C6	20.8093	7.2989	0.00635056
D1	29.2221	D4	22.6094	6.6127	0.0102183	0.0115026
D2	28.8012	D5	22.2397	6.56156	0.010587
D3	28.9363	D6	22.7468	6.18943	0.0137024
E1	30.8617	E4	20.7206	10.1412	0.000885534	0.00106005
E2	30.5914	E5	20.2339	10.3576	0.000762184
E3	30.3234	E6	20.9735	9.34995	0.00153244
F1	27.7703	F4	20.8069	6.96339	0.00801329	0.00913118
F2	27.4667	F5	20.9734	6.49325	0.0111004
F3	27.7819	F6	20.8657	6.91617	0.00827989
A7	35.6262	A10	29.5295	6.0967	0.0146121	0.0193118
A8	35.157	A11	29.8454	5.31156	0.0251803
A9	34.95	A12	29.1656	5.78445	0.0181429
B7	22.9464	B10	18.4107	4.53567	0.043115	0.0479453
B8	22.9102	B11	18.2924	4.61785	0.0407277				0.0193118	0.431754	0.0421952	0.00539678	0.0199682	0.0331793
B9	22.384	B12	18.3249	4.05906	0.0599931
C7	26.164	C10	21.4146	4.74935	0.0371796	0.045309
C8	26.1104	C11	21.5989	4.51144	0.0438451
C9	26.0285	C12	21.8415	4.18699	0.0549022
D7	33.6727	D10	22.1944	11.4783	0.0003505	0.00539678
D8	28.8277	D11	21.9046	6.92312	0.00824011
D9	29.0175	D12	21.9777	7.03984	0.00759973
E7	26.8956	E10	20.0269	6.86875	0.00855656	0.0173466
E8	26.1183	E11	20.6184	5.49992	0.0220983
E9	26.0845	E12	20.5373	5.54726	0.021385
F7	26.211	F10	20.6414	5.56962	0.0210561	0.0210181
F8	26.6816	F11	20.6632	6.01835	0.0154275
F9	26.1837	F12	20.9497	5.23401	0.0265708

## Sheet: Sheet2
描述
		个案数	平均值	标准 偏差	标准 错误	平均值的 95% 置信区间		最小值	最大值
						下限	上限
抗病	.00	3	0.0067372	0.00144946	0.000836846	0.00313654	0.0103379	0.00518927	0.0080624
	24.00	3	0.0389276	0.0159474	0.00920726	-0.000688011	0.0785433	0.0266262	0.0569454
	48.00	3	0.0064233	0.00160302	0.000925502	0.00244118	0.0104054	0.00485789	0.00806144
	72.00	3	0.0115026	0.001914	0.00110505	0.00674793	0.0162572	0.0102183	0.0137024
	96.00	3	0.00106005	0.000413722	0.000238862	3.23106e-05	0.00208779	0.000762184	0.00153244
	120.00	3	0.00913118	0.00171056	0.000987593	0.00488191	0.0133804	0.00801329	0.0111004
	总计	18	0.012297	0.0138608	0.00326703	0.00540416	0.0191898	0.000762184	0.0569454
感病	.00	3	0.0193118	0.00538021	0.00310626	0.00594658	0.0326769	0.0146121	0.0251803
	24.00	3	0.0479453	0.0105018	0.00606321	0.0218574	0.0740332	0.0407277	0.0599931
	48.00	3	0.045309	0.00895153	0.00516817	0.0230721	0.0675458	0.0371796	0.0549022
	72.00	3	0.00539678	0.00438192	0.0025299	-0.00548851	0.0162821	0.0003505	0.00824011
	96.00	3	0.0173466	0.00762076	0.00439985	-0.00158441	0.0362776	0.00855656	0.0220983
	120.00	3	0.0210181	0.00557176	0.00321686	0.0071771	0.0348591	0.0154275	0.0265708
	总计	18	0.0260546	0.0170214	0.00401199	0.01759	0.0345191	0.0003505	0.0599931
多重比较
因变量				平均值差值 (I-J)	标准 错误	显著性	95% 置信区间
							下限	上限
抗病	LSD	.00	24.00	-.03219*	0.00543397	6.98927e-05	-0.04403	-0.0203508
			48.00	0.0003139	0.00543397	0.954886	-0.0115257	0.0121535
			72.00	-0.00476536	0.00543397	0.397726	-0.016605	0.00707423
			96.00	0.00567714	0.00543397	0.316728	-0.00616245	0.0175167
			120.00	-0.00239398	0.00543397	0.667364	-0.0142336	0.00944561
		24.00	.00	.03219*	0.00543397	6.98927e-05	0.0203508	0.04403
			48.00	.03250*	0.00543397	6.39399e-05	0.0206647	0.0443439
			72.00	.02743*	0.00543397	0.00028596	0.0155855	0.0392647
			96.00	.03787*	0.00543397	1.49876e-05	0.026028	0.0497072
			120.00	.02980*	0.00543397	0.000139944	0.0179568	0.041636
		48.00	.00	-0.0003139	0.00543397	0.954886	-0.0121535	0.0115257
			24.00	-.03250*	0.00543397	6.39399e-05	-0.0443439	-0.0206647
			72.00	-0.00507926	0.00543397	0.368359	-0.0169189	0.00676033
			96.00	0.00536324	0.00543397	0.343133	-0.00647635	0.0172028
			120.00	-0.00270788	0.00543397	0.627263	-0.0145475	0.00913171
		72.00	.00	0.00476536	0.00543397	0.397726	-0.00707423	0.016605
			24.00	-.02743*	0.00543397	0.00028596	-0.0392647	-0.0155855
			48.00	0.00507926	0.00543397	0.368359	-0.00676033	0.0169189
			96.00	0.0104425	0.00543397	0.0787067	-0.00139709	0.0222821
			120.00	0.00237138	0.00543397	0.670295	-0.00946822	0.014211
		96.00	.00	-0.00567714	0.00543397	0.316728	-0.0175167	0.00616245
			24.00	-.03787*	0.00543397	1.49876e-05	-0.0497072	-0.026028
			48.00	-0.00536324	0.00543397	0.343133	-0.0172028	0.00647635
			72.00	-0.0104425	0.00543397	0.0787067	-0.0222821	0.00139709
			120.00	-0.00807113	0.00543397	0.163252	-0.0199107	0.00376847
		120.00	.00	0.00239398	0.00543397	0.667364	-0.00944561	0.0142336
			24.00	-.02980*	0.00543397	0.000139944	-0.041636	-0.0179568
			48.00	0.00270788	0.00543397	0.627263	-0.00913171	0.0145475
			72.00	-0.00237138	0.00543397	0.670295	-0.014211	0.00946822
			96.00	0.00807113	0.00543397	0.163252	-0.00376847	0.0199107
感病	LSD	.00	24.00	-.02863*	0.00603403	0.000475894	-0.0417805	-0.0154865
			48.00	-.02600*	0.00603403	0.00101665	-0.0391442	-0.0128502
			72.00	.01391*	0.00603403	0.0397572	0.000767958	0.027062
			96.00	0.00196514	0.00603403	0.750278	-0.0111819	0.0151122
			120.00	-0.00170636	0.00603403	0.782157	-0.0148534	0.0114407
		24.00	.00	.02863*	0.00603403	0.000475894	0.0154865	0.0417805
			48.00	0.00263633	0.00603403	0.669935	-0.0105107	0.0157834
			72.00	.04255*	0.00603403	1.33491e-05	0.0294015	0.0556955
			96.00	.03060*	0.00603403	0.000274729	0.0174516	0.0437457
			120.00	.02693*	0.00603403	0.000775681	0.0137801	0.0400742
		48.00	.00	.02600*	0.00603403	0.00101665	0.0128502	0.0391442
			24.00	-0.00263633	0.00603403	0.669935	-0.0157834	0.0105107
			72.00	.03991*	0.00603403	2.48485e-05	0.0267652	0.0530592
			96.00	.02796*	0.00603403	0.000576006	0.0148153	0.0411094
			120.00	.02429*	0.00603403	0.00168232	0.0111438	0.0374379
		72.00	.00	-.01391*	0.00603403	0.0397572	-0.027062	-0.000767958
			24.00	-.04255*	0.00603403	1.33491e-05	-0.0556955	-0.0294015
			48.00	-.03991*	0.00603403	2.48485e-05	-0.0530592	-0.0267652
			96.00	-0.0119498	0.00603403	0.0710528	-0.0250969	0.00119719
			120.00	-.01562*	0.00603403	0.0237071	-0.0287684	-0.00247432
		96.00	.00	-0.00196514	0.00603403	0.750278	-0.0151122	0.0111819
			24.00	-.03060*	0.00603403	0.000274729	-0.0437457	-0.0174516
			48.00	-.02796*	0.00603403	0.000576006	-0.0411094	-0.0148153
			72.00	0.0119498	0.00603403	0.0710528	-0.00119719	0.0250969
			120.00	-0.00367151	0.00603403	0.554221	-0.0168185	0.00947552
		120.00	.00	0.00170636	0.00603403	0.782157	-0.0114407	0.0148534
			24.00	-.02693*	0.00603403	0.000775681	-0.0400742	-0.0137801
			48.00	-.02429*	0.00603403	0.00168232	-0.0374379	-0.0111438
			72.00	.01562*	0.00603403	0.0237071	0.00247432	0.0287684
			96.00	0.00367151	0.00603403	0.554221	-0.00947552	0.0168185
*. 平均值差值的显著性水平为 0.05。
抗病							感病
时间		个案数	Alpha 的子集 = 0.05				时间		个案数	Alpha 的子集 = 0.05
			1	2						1	2	3
邓肯a	96.00	3	0.00106005				邓肯a	72.00	3	0.00539678
	48.00	3	0.0064233					96.00	3	0.0173466	0.0173466
	.00	3	0.0067372					.00	3		0.0193118
	120.00	3	0.00913118					120.00	3		0.0210181
	72.00	3	0.0115026					48.00	3			0.045309
	24.00	3		0.0389276				24.00	3			0.0479453
	显著性		0.104634	1				显著性		0.0710528	0.573714	0.669935
将显示齐性子集中各个组的平均值。							将显示齐性子集中各个组的平均值。
a. 使用调和平均值样本大小 = 3.000。							a. 使用调和平均值样本大小 = 3.000。
