# Supplementary material for: TaPR1 Interacts With TaTLP1 via the αIV Helix to Be Involved in Wheat Defense to Puccinia triticina Through the CAPE1 Motif
Source: Front Plant Sci. 2022 May 26;13:874654. doi: 10.3389/fpls.2022.874654 (PMC9199852; doi:10.3389/fpls.2022.874654)
Supplement: Supplementary file 6 [file Data_Sheet_4.XLS]

## Sheet: Sheet1
			A1	32.7447	A4	26.477	6.26765	0.0129793	0.0176804		0.0176804	0.0372637	0.41839	0.301199	0.190695	0.205095
			A2	32.7506	A5	26.6334	6.11728	0.0144051			0.108156	0.116982	0.125437	0.0643298	0.0186283	0.0267667
			A3	32.1767	A6	26.8922	5.28451	0.025657
			B1	25.6967	B4	21.0381	4.6586	0.0395932	0.0372637
			B2	25.6582	B5	20.7927	4.86557	0.0343018
			B3	25.6988	B6	20.977	4.7218	0.0378962
			C1	21.554	C4	20.0092	1.54476	0.342754	0.41839
			C2	21.8452	C5	20.7184	1.12685	0.457913
			C3	21.6873	C6	20.5496	1.13763	0.454504
			D1	24.0081	D4	22.3319	1.67618	0.31291	0.301199
			D2	23.5546	D5	22.2008	1.35384	0.391248
			D3	24.7739	D6	22.4479	2.32598	0.199439
			E1	22.4941	E4	19.9243	2.56986	0.168421	0.190695
			E2	22.2053	E5	20.0198	2.18552	0.219834
			E3	22.616	E6	20.1724	2.44355	0.183831
			F1	23.0415	F4	21.2149	1.82661	0.281925	0.205095
			F2	22.9507	F5	20.5135	2.43721	0.18464
			F3	23.4818	F6	20.7324	2.74932	0.14872
			A7	29.8075	A10	27.0033	2.80422	0.143168	0.108156
			A8	30.9503	A11	26.3026	4.6478	0.0398909
			A9	29.4152	A12	26.5931	2.82204	0.141411
			B7	23.9915	B10	20.8011	3.19046	0.10954	0.116982
			B8	24.1915	B11	20.8799	3.31161	0.100718
			B9	23.8008	B12	20.9714	2.82943	0.140688
			C7	25.1322	C10	21.8381	3.29407	0.10195	0.125437
			C8	25.1576	C11	21.8582	3.29943	0.101572
			C9	24.6416	C12	22.1087	2.53292	0.172788
			D7	27.4245	D10	22.7514	4.67312	0.0391968	0.0643298
			D8	26.3217	D11	22.7725	3.54915	0.0854277
			D9	26.7294	D12	22.8588	3.8706	0.0683647
			E7	28.1798	E10	21.2975	6.88235	0.0084763	0.0186283
			E8	26.7495	E11	21.4271	5.32234	0.0249928
			E9	26.9364	E12	21.457	5.47935	0.0224157
			F7	29.0048	F10	21.8518	7.15303	0.00702625	0.0267667
			F8	26.5244	F11	21.6687	4.85566	0.0345383
			F9	26.476	F12	21.7858	4.6902	0.0387356

## Sheet: Sheet2
描述
		个案数	平均值	标准 偏差	标准 错误	平均值的 95% 置信区间		最小值	最大值
						下限	上限
抗病	.00	3	0.0176804	0.00694456	0.00400945	0.000429185	0.0349317	0.0129793	0.025657
	24.00	3	0.0372637	0.00270177	0.00155987	0.0305522	0.0439753	0.0343018	0.0395932
	48.00	3	0.41839	0.0655255	0.0378312	0.255616	0.581165	0.342754	0.457913
	72.00	3	0.301199	0.0964392	0.0556792	0.0616311	0.540767	0.199439	0.391248
	96.00	3	0.190695	0.0263847	0.0152332	0.125152	0.256238	0.168421	0.219834
	120.00	3	0.205095	0.0689181	0.0397899	0.0338931	0.376297	0.14872	0.281925
	总计	18	0.195054	0.15167	0.035749	0.11963	0.270478	0.0129793	0.457913
感病	.00	3	0.108156	0.0591263	0.0341366	-0.0387213	0.255034	0.0398909	0.143168
	24.00	3	0.116982	0.0209984	0.0121234	0.0648192	0.169145	0.100718	0.140688
	48.00	3	0.125437	0.0410081	0.023676	0.0235669	0.227306	0.101572	0.172788
	72.00	3	0.0643298	0.0233781	0.0134973	0.00625545	0.122404	0.0391968	0.0854277
	96.00	3	0.0186283	0.00888577	0.0051302	-0.00344523	0.0407017	0.0084763	0.0249928
	120.00	3	0.0267667	0.0172241	0.00994433	-0.0160203	0.0695537	0.00702625	0.0387356
	总计	18	0.0767166	0.0520744	0.012274	0.0508207	0.102613	0.00702625	0.172788
多重比较
因变量				平均值差值 (I-J)	标准 错误	显著性	95% 置信区间
							下限	上限
抗病	LSD	.00	24.00	-0.0195833	0.0460621	0.678252	-0.119944	0.0807775
			48.00	-.40071*	0.0460621	1.57833e-06	-0.501071	-0.300349
			72.00	-.28352*	0.0460621	4.90799e-05	-0.38388	-0.183158
			96.00	-.17301*	0.0460621	0.00274026	-0.273375	-0.0726538
			120.00	-.18741*	0.0460621	0.00155712	-0.287776	-0.087054
		24.00	.00	0.0195833	0.0460621	0.678252	-0.0807775	0.119944
			48.00	-.38113*	0.0460621	2.65841e-06	-0.481487	-0.280766
			72.00	-.26394*	0.0460621	9.456e-05	-0.364296	-0.163575
			96.00	-.15343*	0.0460621	0.00598741	-0.253792	-0.0530705
			120.00	-.16783*	0.0460621	0.00336585	-0.268192	-0.0674707
		48.00	.00	.40071*	0.0460621	1.57833e-06	0.300349	0.501071
			24.00	.38113*	0.0460621	2.65841e-06	0.280766	0.481487
			72.00	.11719*	0.0460621	0.025739	0.0168303	0.217552
			96.00	.22770*	0.0460621	0.000340238	0.127335	0.328056
			120.00	.21330*	0.0460621	0.000579504	0.112934	0.313656
		72.00	.00	.28352*	0.0460621	4.90799e-05	0.183158	0.38388
			24.00	.26394*	0.0460621	9.456e-05	0.163575	0.364296
			48.00	-.11719*	0.0460621	0.025739	-0.217552	-0.0168303
			96.00	.11050*	0.0460621	0.0335784	0.0101434	0.210865
			120.00	0.096104	0.0460621	0.0589506	-0.00425679	0.196465
		96.00	.00	.17301*	0.0460621	0.00274026	0.0726538	0.273375
			24.00	.15343*	0.0460621	0.00598741	0.0530705	0.253792
			48.00	-.22770*	0.0460621	0.000340238	-0.328056	-0.127335
			72.00	-.11050*	0.0460621	0.0335784	-0.210865	-0.0101434
			120.00	-0.0144002	0.0460621	0.759932	-0.114761	0.0859606
		120.00	.00	.18741*	0.0460621	0.00155712	0.087054	0.287776
			24.00	.16783*	0.0460621	0.00336585	0.0674707	0.268192
			48.00	-.21330*	0.0460621	0.000579504	-0.313656	-0.112934
			72.00	-0.096104	0.0460621	0.0589506	-0.196465	0.00425679
			96.00	0.0144002	0.0460621	0.759932	-0.0859606	0.114761
感病	LSD	.00	24.00	-0.00882551	0.0269581	0.749022	-0.0675622	0.0499112
			48.00	-0.01728	0.0269581	0.533577	-0.0760168	0.0414567
			72.00	0.0438267	0.0269581	0.129963	-0.01491	0.102563
			96.00	.08953*	0.0269581	0.00609876	0.0307915	0.148265
			120.00	.08139*	0.0269581	0.0106804	0.0226531	0.140126
		24.00	.00	0.00882551	0.0269581	0.749022	-0.0499112	0.0675622
			48.00	-0.00845452	0.0269581	0.759197	-0.0671912	0.0502822
			72.00	0.0526522	0.0269581	0.0745224	-0.00608448	0.111389
			96.00	.09835*	0.0269581	0.00333639	0.039617	0.15709
			120.00	.09022*	0.0269581	0.00581774	0.0314786	0.148952
		48.00	.00	0.01728	0.0269581	0.533577	-0.0414567	0.0760168
			24.00	0.00845452	0.0269581	0.759197	-0.0502822	0.0671912
			72.00	.06111*	0.0269581	0.0426894	0.00237004	0.119843
			96.00	.10681*	0.0269581	0.00188649	0.0480716	0.165545
			120.00	.09867*	0.0269581	0.00326553	0.0399331	0.157407
		72.00	.00	-0.0438267	0.0269581	0.129963	-0.102563	0.01491
			24.00	-0.0526522	0.0269581	0.0745224	-0.111389	0.00608448
			48.00	-.06111*	0.0269581	0.0426894	-0.119843	-0.00237004
			96.00	0.0457015	0.0269581	0.115791	-0.0130352	0.104438
			120.00	0.037563	0.0269581	0.188775	-0.0211737	0.0962998
		96.00	.00	-.08953*	0.0269581	0.00609876	-0.148265	-0.0307915
			24.00	-.09835*	0.0269581	0.00333639	-0.15709	-0.039617
			48.00	-.10681*	0.0269581	0.00188649	-0.165545	-0.0480716
			72.00	-0.0457015	0.0269581	0.115791	-0.104438	0.0130352
			120.00	-0.00813847	0.0269581	0.767902	-0.0668752	0.0505983
		120.00	.00	-.08139*	0.0269581	0.0106804	-0.140126	-0.0226531
			24.00	-.09022*	0.0269581	0.00581774	-0.148952	-0.0314786
			48.00	-.09867*	0.0269581	0.00326553	-0.157407	-0.0399331
			72.00	-0.037563	0.0269581	0.188775	-0.0962998	0.0211737
			96.00	0.00813847	0.0269581	0.767902	-0.0505983	0.0668752
*. 平均值差值的显著性水平为 0.05。
抗病									感病
时间		个案数	Alpha 的子集 = 0.05						时间		个案数	Alpha 的子集 = 0.05
			1	2	3	4						1	2
邓肯a	.00	3	0.0176804						邓肯a	96.00	3	0.0186283
	24.00	3	0.0372637							120.00	3	0.0267667
	96.00	3		0.190695						72.00	3	0.0643298	0.0643298
	120.00	3		0.205095	0.205095					.00	3		0.108156
	72.00	3			0.301199					24.00	3		0.116982
	48.00	3				0.41839				48.00	3		0.125437
	显著性		0.678252	0.759932	0.0589506	1				显著性		0.13211	0.056747
将显示齐性子集中各个组的平均值。									将显示齐性子集中各个组的平均值。
a. 使用调和平均值样本大小 = 3.000。									a. 使用调和平均值样本大小 = 3.000。
