# Supplementary material for: TaPR1 Interacts With TaTLP1 via the αIV Helix to Be Involved in Wheat Defense to Puccinia triticina Through the CAPE1 Motif
Source: Front Plant Sci. 2022 May 26;13:874654. doi: 10.3389/fpls.2022.874654 (PMC9199852; doi:10.3389/fpls.2022.874654)
Supplement: Supplementary file 7 [file Data_Sheet_5.XLS]

## Sheet: Sheet1
A1	37.4276	A4	28.7012	8.72642	0.00236095	0.00246204		0.00246204	0.0411803	0.109383	0.102008	0.0821842	0.0216854
A2	37.51	A5	29.1682	8.34175	0.00308235			0.00220427	0.0036279	0.00610451	0.00438161	0.000495269	0.00112903
A3	37.6019	A6	28.5943	9.00762	0.00194283
B1	30.1768	B4	25.6643	4.51248	0.0438135	0.0411803
B2	30.2458	B5	25.4472	4.79865	0.0359304
B3	30.3916	B6	25.8786	4.51302	0.043797
C1	26.0498	C4	22.8878	3.16198	0.111725	0.109383
C2	26.026	C5	22.53	3.49597	0.0886354
C3	25.8492	C6	22.8811	2.96817	0.127788
D1	29.3345	D4	25.8003	3.53425	0.0863148	0.102008
D2	29.3401	D5	26.1303	3.20984	0.10808
D3	29.1846	D6	26.0214	3.1632	0.11163
E1	27.8629	E4	24.0188	3.84409	0.0696327	0.0821842
E2	27.6762	E5	24.2753	3.40085	0.0946762
E3	27.5804	E6	23.9764	3.60395	0.0822437
F1	30.1233	F4	24.74	5.38333	0.0239583	0.0216854
F2	30.0049	F5	24.3931	5.6118	0.0204494
F3	29.797	F6	24.1992	5.59781	0.0206487
A7	37.8104	A10	28.384	9.4264	0.00145335	0.00220427
A8	37	A11	28.1342	8.8658	0.00214352
A9	37.1186	A12	28.7454	8.37318	0.00301594
B7	30.9214	B10	22.6275	8.29386	0.00318639	0.0036279
B8	30.7076	B11	22.3335	8.37405	0.00301412
B9	30.2963	B12	22.558	7.73829	0.0046832
C7	30.6838	C10	23.2726	7.41122	0.00587491	0.00610451
C8	30.3731	C11	22.5616	7.81154	0.00445135
C9	29.9664	C12	22.9983	6.96808	0.00798728
D7	32.293	D10	24.0656	8.22739	0.00333664	0.00438161
D8	32.2549	D11	24.2355	8.01938	0.00385413
D9	31.9357	D12	24.5438	7.39191	0.00595407
E7	33.6011	E10	23.3495	10.2516	0.000820261	0.000495269
E8	34.5363	E11	22.9566	11.5797	0.000326711
E9	34.2239	E12	22.6967	11.5271	0.000338834
F7	32.945	F10	23.2882	9.65678	0.00123885	0.00112903
F8	32.8038	F11	23.0957	9.70808	0.00119558
F9	33.0734	F12	23.0376	10.0358	0.000952656

## Sheet: Sheet2
描述
		个案数	平均值	标准 偏差	标准 错误	平均值的 95% 置信区间		最小值	最大值
						下限	上限
抗病	.00	3	0.00246204	0.000576445	0.000332811	0.00103007	0.00389401	0.00194283	0.00308235
	24.00	3	0.0411803	0.00454655	0.00262495	0.0298861	0.0524745	0.0359304	0.0438135
	48.00	3	0.109383	0.0196813	0.011363	0.0604917	0.158274	0.0886354	0.127788
	72.00	3	0.102008	0.0137063	0.00791336	0.0679598	0.136057	0.0863148	0.11163
	96.00	3	0.0821842	0.0125219	0.0072295	0.0510782	0.11329	0.0696327	0.0946762
	120.00	3	0.0216854	0.00197086	0.00113788	0.0167896	0.0265813	0.0204494	0.0239583
	总计	18	0.0598172	0.0427015	0.0100648	0.0385822	0.0810521	0.00194283	0.127788
感病	.00	3	0.00220427	0.000783063	0.000452102	0.000259034	0.00414951	0.00145335	0.00301594
	24.00	3	0.0036279	0.000917965	0.000529987	0.00134755	0.00590826	0.00301412	0.0046832
	48.00	3	0.00610451	0.00177911	0.00102717	0.00168496	0.0105241	0.00445135	0.00798728
	72.00	3	0.00438161	0.00138615	0.000800293	0.000938228	0.007825	0.00333664	0.00595407
	96.00	3	0.000495269	0.000281517	0.000162534	-0.000204058	0.0011946	0.000326711	0.000820261
	120.00	3	0.00112903	0.000154268	8.90665e-05	0.000745806	0.00151225	0.000952656	0.00123885
	总计	18	0.00299043	0.00217384	0.000512379	0.00190941	0.00407146	0.000326711	0.00798728
多重比较
因变量				平均值差值 (I-J)	标准 错误	显著性	95% 置信区间
							下限	上限
抗病	LSD	.00	24.00	-.03872*	0.00917063	0.00118472	-0.0586993	-0.0187372
			48.00	-.10692*	0.00917063	6.66294e-08	-0.126902	-0.0869398
			72.00	-.09955*	0.00917063	1.46597e-07	-0.119527	-0.0795651
			96.00	-.07972*	0.00917063	1.59002e-06	-0.0997033	-0.0597411
			120.00	-0.0192234	0.00917063	0.0579352	-0.0392045	0.000757675
		24.00	.00	.03872*	0.00917063	0.00118472	0.0187372	0.0586993
			48.00	-.06820*	0.00917063	7.87115e-06	-0.0881837	-0.0482215
			72.00	-.06083*	0.00917063	2.41949e-05	-0.080809	-0.0408468
			96.00	-.04100*	0.00917063	0.000764029	-0.060985	-0.0210228
			120.00	0.0194949	0.00917063	0.0549652	-0.000486227	0.0394759
		48.00	.00	.10692*	0.00917063	6.66294e-08	0.0869398	0.126902
			24.00	.06820*	0.00917063	7.87115e-06	0.0482215	0.0881837
			72.00	0.00737474	0.00917063	0.436941	-0.0126063	0.0273558
			96.00	.02720*	0.00917063	0.0117918	0.00721762	0.0471798
			120.00	.08770*	0.00917063	5.79214e-07	0.0677164	0.107679
		72.00	.00	.09955*	0.00917063	1.46597e-07	0.0795651	0.119527
			24.00	.06083*	0.00917063	2.41949e-05	0.0408468	0.080809
			48.00	-0.00737474	0.00917063	0.436941	-0.0273558	0.0126063
			96.00	0.019824	0.00917063	0.0515562	-0.000157118	0.039805
			120.00	.08032*	0.00917063	1.46974e-06	0.0603416	0.100304
		96.00	.00	.07972*	0.00917063	1.59002e-06	0.0597411	0.0997033
			24.00	.04100*	0.00917063	0.000764029	0.0210228	0.060985
			48.00	-.02720*	0.00917063	0.0117918	-0.0471798	-0.00721762
			72.00	-0.019824	0.00917063	0.0515562	-0.039805	0.000157118
			120.00	.06050*	0.00917063	2.54879e-05	0.0405177	0.0804798
		120.00	.00	0.0192234	0.00917063	0.0579352	-0.000757675	0.0392045
			24.00	-0.0194949	0.00917063	0.0549652	-0.0394759	0.000486227
			48.00	-.08770*	0.00917063	5.79214e-07	-0.107679	-0.0677164
			72.00	-.08032*	0.00917063	1.46974e-06	-0.100304	-0.0603416
			96.00	-.06050*	0.00917063	2.54879e-05	-0.0804798	-0.0405177
感病	LSD	.00	24.00	-0.00142363	0.000859298	0.123466	-0.00329588	0.000448617
			48.00	-.00390*	0.000859298	0.000679167	-0.00577249	-0.00202799
			72.00	-.00218*	0.000859298	0.0262326	-0.00404959	-0.000305093
			96.00	0.001709	0.000859298	0.070012	-0.000163247	0.00358125
			120.00	0.00107524	0.000859298	0.234668	-0.000797007	0.00294749
		24.00	.00	0.00142363	0.000859298	0.123466	-0.000448617	0.00329588
			48.00	-.00248*	0.000859298	0.0137759	-0.00434886	-0.000604361
			72.00	-0.000753709	0.000859298	0.39764	-0.00262596	0.00111854
			96.00	.00313*	0.000859298	0.00335363	0.00126039	0.00500488
			120.00	.00250*	0.000859298	0.0131287	0.000626626	0.00437112
		48.00	.00	.00390*	0.000859298	0.000679167	0.00202799	0.00577249
			24.00	.00248*	0.000859298	0.0137759	0.000604361	0.00434886
			72.00	0.0017229	0.000859298	0.068054	-0.000149348	0.00359515
			96.00	.00561*	0.000859298	2.81976e-05	0.003737	0.00748149
			120.00	.00498*	0.000859298	8.60443e-05	0.00310324	0.00684774
		72.00	.00	.00218*	0.000859298	0.0262326	0.000305093	0.00404959
			24.00	0.000753709	0.000859298	0.39764	-0.00111854	0.00262596
			48.00	-0.0017229	0.000859298	0.068054	-0.00359515	0.000149348
			96.00	.00389*	0.000859298	0.000698521	0.00201409	0.00575859
			120.00	.00325*	0.000859298	0.00259902	0.00138034	0.00512483
		96.00	.00	-0.001709	0.000859298	0.070012	-0.00358125	0.000163247
			24.00	-.00313*	0.000859298	0.00335363	-0.00500488	-0.00126039
			48.00	-.00561*	0.000859298	2.81976e-05	-0.00748149	-0.003737
			72.00	-.00389*	0.000859298	0.000698521	-0.00575859	-0.00201409
			120.00	-0.000633759	0.000859298	0.474974	-0.00250601	0.00123849
		120.00	.00	-0.00107524	0.000859298	0.234668	-0.00294749	0.000797007
			24.00	-.00250*	0.000859298	0.0131287	-0.00437112	-0.000626626
			48.00	-.00498*	0.000859298	8.60443e-05	-0.00684774	-0.00310324
			72.00	-.00325*	0.000859298	0.00259902	-0.00512483	-0.00138034
			96.00	0.000633759	0.000859298	0.474974	-0.00123849	0.00250601
*. 平均值差值的显著性水平为 0.05。
抗病									感病
时间		个案数	Alpha 的子集 = 0.05						时间		个案数	Alpha 的子集 = 0.05
			1	2	3	4						1	2	3	4
邓肯a	.00	3	0.00246204						邓肯a	96.00	3	0.000495269
	120.00	3	0.0216854	0.0216854						120.00	3	0.00112903
	24.00	3		0.0411803						.00	3	0.00220427	0.00220427
	96.00	3			0.0821842					24.00	3		0.0036279	0.0036279
	72.00	3			0.102008	0.102008				72.00	3			0.00438161	0.00438161
	48.00	3				0.109383				48.00	3				0.00610451
	显著性		0.0579352	0.0549652	0.0515562	0.436941				显著性		0.082044	0.123466	0.39764	0.068054
将显示齐性子集中各个组的平均值。									将显示齐性子集中各个组的平均值。
a. 使用调和平均值样本大小 = 3.000。									a. 使用调和平均值样本大小 = 3.000。
