# Supplementary material for: TaPR1 Interacts With TaTLP1 via the αIV Helix to Be Involved in Wheat Defense to Puccinia triticina Through the CAPE1 Motif
Source: Front Plant Sci. 2022 May 26;13:874654. doi: 10.3389/fpls.2022.874654 (PMC9199852; doi:10.3389/fpls.2022.874654)
Supplement: Supplementary file 8 [file Data_Sheet_6.XLS]

## Sheet: Sheet1
A1	36.621	A4	30.0282	6.59285	0.0103599	0.0141845		0.0141845	0.150841	0.244671	2.07804	3.60203	1.05829
A2	36.1691	A5	30.3149	5.85415	0.0172872			0.000444887	0.00166616	0.0243623	0.000797551	0.020125	0.0040112
A3	36.493	A6	30.4251	6.06792	0.0149064
B1	30.1937	B4	27.5692	2.62456	0.162155	0.150841
B2	30.8253	B5	27.8355	2.98983	0.125884
B3	30.1527	B6	27.5488	2.60397	0.164485
C1	24.2015	C4	22.2666	1.93496	0.261528	0.244671
C2	24.44	C5	22.4625	1.97753	0.253924
C3	24.4548	C6	22.2609	2.19389	0.218561
D1	31.4661	D4	32.7587	-1.29264	2.44975	2.07804
D2	31.7614	D5	32.3303	-0.568937	1.48343
D3	31.214	D6	32.4162	-1.20223	2.30095
E1	28.8957	E4	30.5192	-1.62348	3.08117	3.60203
E2	28.0696	E5	30.0555	-1.9859	3.9611
E3	28.5677	E6	30.4799	-1.9122	3.76382
F1	25.0859	F4	25.769	-0.683134	1.60562	1.05829
F2	25.8292	F5	25.1926	0.636591	0.643231
F3	25.8561	F6	25.7453	0.110874	0.926027
A7	37.2442	A10	25.8453	11.3989	0.000370329	0.000444887
A8	37.5556	A11	25.6824	11.8732	0.000266567
A9	36.2266	A12	25.7416	10.485	0.000697764
B7	28.555	B10	18.9008	9.65415	0.00124111	0.00166616
B8	28.0809	B11	19.4014	8.67948	0.00243903
B9	29.0795	B12	19.5124	9.56707	0.00131833
C7	26.7222	C10	20.9794	5.74278	0.0186746	0.0243623
C8	26.3055	C11	21.2345	5.07102	0.0297489
C9	25.5698	C12	20.2283	5.34148	0.0246635
D7	33.8583	D10	21.4347	12.4236	0.000182018	0.00054552
D8	32.4578	D11	22.0886	10.3691	0.000756093
D9	32.2359	D12	21.7523	10.4836	0.000698448
E7	28.5572	E10	22.1897	6.36748	0.0121115	0.020125
E8	28.219	E11	22.9808	5.23819	0.026494
E9	28.2608	E12	22.7392	5.52156	0.0217694
F7	27.7367	F10	19.9608	7.77589	0.00456272	0.0040112
F8	28.5279	F11	20.0942	8.43374	0.00289196
F9	28.0686	F12	20.2979	7.77078	0.00457892

## Sheet: Sheet2
描述
		个案数	平均值	标准 偏差	标准 错误	平均值的 95% 置信区间		最小值	最大值
						下限	上限
抗病	.00	3	0.0141845	0.00351965	0.00203207	0.00544121	0.0229278	0.0103599	0.0172872
	24.00	3	0.150841	0.021645	0.0124968	0.097072	0.20461	0.125884	0.164485
	48.00	3	0.244671	0.0229296	0.0132384	0.187711	0.301631	0.218561	0.261528
	72.00	3	2.07804	0.520297	0.300394	0.785553	3.37053	1.48343	2.44975
	96.00	3	3.60203	0.461738	0.266584	2.45501	4.74905	3.08117	3.9611
	120.00	3	1.05829	0.494642	0.285582	-0.170466	2.28705	0.643231	1.60562
	总计	18	1.19134	1.35904	0.320329	0.515509	1.86718	0.0103599	3.9611
感病	.00	3	0.000444887	0.00022506	0.000129938	-0.000114193	0.00100397	0.000266567	0.000697764
	24.00	3	0.00166616	0.000670437	0.000387077	6.98838e-07	0.00333161	0.00124111	0.00243903
	48.00	3	0.0243623	0.00554329	0.00320042	0.010592	0.0381326	0.0186746	0.0297489
	72.00	3	0.00054552	0.000316118	0.000182511	-0.000239762	0.0013308	0.000182018	0.000756093
	96.00	3	0.020125	0.0073309	0.00423249	0.00191402	0.0383359	0.0121115	0.026494
	120.00	3	0.0040112	0.000969324	0.00055964	0.00160327	0.00641913	0.00289196	0.00457892
	总计	18	0.00852584	0.0106199	0.00250313	0.00324469	0.013807	0.000182018	0.0297489
多重比较
因变量				平均值差值 (I-J)	标准 错误	显著性	95% 置信区间
							下限	上限
抗病	LSD	.00	24.00	-0.136657	0.28472	0.639879	-0.757008	0.483695
			48.00	-0.230487	0.28472	0.433975	-0.850838	0.389865
			72.00	-2.06386*	0.28472	1.01642e-05	-2.68421	-1.44351
			96.00	-3.58785*	0.28472	2.79945e-08	-4.2082	-2.9675
			120.00	-1.04411*	0.28472	0.00322376	-1.66446	-0.423758
		24.00	.00	0.136657	0.28472	0.639879	-0.483695	0.757008
			48.00	-0.0938299	0.28472	0.74742	-0.714181	0.526521
			72.00	-1.92720*	0.28472	1.98974e-05	-2.54755	-1.30685
			96.00	-3.45119*	0.28472	4.32266e-08	-4.07154	-2.83084
			120.00	-.90745*	0.28472	0.00781636	-1.5278	-0.287101
		48.00	.00	0.230487	0.28472	0.433975	-0.389865	0.850838
			24.00	0.0938299	0.28472	0.74742	-0.526521	0.714181
			72.00	-1.83337*	0.28472	3.21101e-05	-2.45372	-1.21302
			96.00	-3.35736*	0.28472	5.87574e-08	-3.97771	-2.73701
			120.00	-.81362*	0.28472	0.0144172	-1.43397	-0.193272
		72.00	.00	2.06386*	0.28472	1.01642e-05	1.44351	2.68421
			24.00	1.92720*	0.28472	1.98974e-05	1.30685	2.54755
			48.00	1.83337*	0.28472	3.21101e-05	1.21302	2.45372
			96.00	-1.52399*	0.28472	0.000172877	-2.14434	-0.903639
			120.00	1.01975*	0.28472	0.00377125	0.399398	1.6401
		96.00	.00	3.58785*	0.28472	2.79945e-08	2.9675	4.2082
			24.00	3.45119*	0.28472	4.32266e-08	2.83084	4.07154
			48.00	3.35736*	0.28472	5.87574e-08	2.73701	3.97771
			72.00	1.52399*	0.28472	0.000172877	0.903639	2.14434
			120.00	2.54374*	0.28472	1.19299e-06	1.92339	3.16409
		120.00	.00	1.04411*	0.28472	0.00322376	0.423758	1.66446
			24.00	.90745*	0.28472	0.00781636	0.287101	1.5278
			48.00	.81362*	0.28472	0.0144172	0.193272	1.43397
			72.00	-1.01975*	0.28472	0.00377125	-1.6401	-0.399398
			96.00	-2.54374*	0.28472	1.19299e-06	-3.16409	-1.92339
感病	LSD	.00	24.00	-0.00122127	0.00309138	0.699734	-0.00795681	0.00551427
			48.00	-.02392*	0.00309138	5.28665e-06	-0.030653	-0.0171819
			72.00	-0.000100633	0.00309138	0.974566	-0.00683618	0.00663491
			96.00	-.01968*	0.00309138	3.57768e-05	-0.0264156	-0.0129445
			120.00	-0.00356631	0.00309138	0.271112	-0.0103019	0.00316923
		24.00	.00	0.00122127	0.00309138	0.699734	-0.00551427	0.00795681
			48.00	-.02270*	0.00309138	8.95362e-06	-0.0294317	-0.0159606
			72.00	0.00112064	0.00309138	0.72328	-0.00561491	0.00785618
			96.00	-.01846*	0.00309138	6.49945e-05	-0.0251944	-0.0117233
			120.00	-0.00234504	0.00309138	0.462747	-0.00908059	0.0043905
		48.00	.00	.02392*	0.00309138	5.28665e-06	0.0171819	0.030653
			24.00	.02270*	0.00309138	8.95362e-06	0.0159606	0.0294317
			72.00	.02382*	0.00309138	5.51733e-06	0.0170812	0.0305523
			96.00	0.00423734	0.00309138	0.195564	-0.00249821	0.0109729
			120.00	.02035*	0.00309138	2.60061e-05	0.0136156	0.0270866
		72.00	.00	0.000100633	0.00309138	0.974566	-0.00663491	0.00683618
			24.00	-0.00112064	0.00309138	0.72328	-0.00785618	0.00561491
			48.00	-.02382*	0.00309138	5.51733e-06	-0.0305523	-0.0170812
			96.00	-.01958*	0.00309138	3.75504e-05	-0.026315	-0.0128439
			120.00	-0.00346568	0.00309138	0.284189	-0.0102012	0.00326986
		96.00	.00	.01968*	0.00309138	3.57768e-05	0.0129445	0.0264156
			24.00	.01846*	0.00309138	6.49945e-05	0.0117233	0.0251944
			48.00	-0.00423734	0.00309138	0.195564	-0.0109729	0.00249821
			72.00	.01958*	0.00309138	3.75504e-05	0.0128439	0.026315
			120.00	.01611*	0.00309138	0.000217389	0.00937823	0.0228493
		120.00	.00	0.00356631	0.00309138	0.271112	-0.00316923	0.0103019
			24.00	0.00234504	0.00309138	0.462747	-0.0043905	0.00908059
			48.00	-.02035*	0.00309138	2.60061e-05	-0.0270866	-0.0136156
			72.00	0.00346568	0.00309138	0.284189	-0.00326986	0.0102012
			96.00	-.01611*	0.00309138	0.000217389	-0.0228493	-0.00937823
*. 平均值差值的显著性水平为 0.05。
抗病									感病
时间		个案数	Alpha 的子集 = 0.05						时间		个案数	Alpha 的子集 = 0.05
			1	2	3	4						1	2
邓肯a	.00	3	0.0141845						邓肯a	.00	3	0.000444887
	24.00	3	0.150841							72.00	3	0.00054552
	48.00	3	0.244671							24.00	3	0.00166616
	120.00	3		1.05829						120.00	3	0.0040112
	72.00	3			2.07804					96.00	3		0.020125
	96.00	3				3.60203				48.00	3		0.0243623
	显著性		0.456364	1	1	1				显著性		0.305705	0.195564
将显示齐性子集中各个组的平均值。									将显示齐性子集中各个组的平均值。
a. 使用调和平均值样本大小 = 3.000。									a. 使用调和平均值样本大小 = 3.000。
