# Supplementary material for: TaPR1 Interacts With TaTLP1 via the αIV Helix to Be Involved in Wheat Defense to Puccinia triticina Through the CAPE1 Motif
Source: Front Plant Sci. 2022 May 26;13:874654. doi: 10.3389/fpls.2022.874654 (PMC9199852; doi:10.3389/fpls.2022.874654)
Supplement: Supplementary file 9 [file Data_Sheet_7.XLS]

## Sheet: Sheet1
A1	27.0965	A4	26.3203	0.77619	0.583907	0.350856
A2	28.6547	A5	26.5698	2.08491	0.235711		PR1-20	0.350856	2.72884	1.25195	0.89377	2.96245	0.411184
A3	28.2534	A6	26.1515	2.1019	0.232952		TC	0.786995	0.709027	0.760124	1.11991	2.88567	1.20123
B1	20.064	B4	21.3114	-1.24741	2.37415	2.72884
B2	19.991	B5	21.7401	-1.74906	3.3614
B3	20.0923	B6	21.3856	-1.29335	2.45096
C1	20.9067	C4	21.257	-0.350355	1.27487	1.25195
C2	20.8428	C5	20.6455	0.197271	0.872199
C3	20.6116	C6	21.2976	-0.685961	1.60877
D1	23.0319	D4	22.6951	0.336784	0.791804	0.89377
D2	23.0501	D5	22.8335	0.216606	0.860588
D3	22.8035	D6	22.8447	-0.0411301	1.02892
E1	19.5919	E4	21.1566	-1.56471	2.95818	2.96245
E2	19.6388	E5	21.1091	-1.47034	2.77087
E3	19.479	E6	21.1381	-1.65914	3.15829
F1	22.4669	F4	21.4124	1.0545	0.481463	0.411184
F2	22.8817	F5	21.3165	1.56514	0.337945
F3	22.3123	F6	21.0405	1.2718	0.414144
A7	27.8029	A10	27.0203	0.782549	0.581339	0.786995
A8	27.1442	A11	27.0941	0.0501537	0.965833
A9	27.354	A12	27.0567	0.29723	0.813814
B7	21.7772	B10	21.1695	0.607712	0.656237	0.709027
B8	21.8029	B11	21.2583	0.544617	0.685574
B9	21.8596	B12	21.5109	0.348738	0.785271
C7	23.382	C10	22.4304	0.951624	0.51705	0.760124			*
C8	22.4431	C11	22.5901	-0.146957	1.10723
C9	22.7841	C12	22.176	0.608036	0.656089
D7	22.5588	D10	22.8988	-0.340073	1.26582	1.11991
D8	22.4936	D11	23.1494	-0.655842	1.57554
D9	22.9953	D12	22.0474	0.94796	0.518365
E7	20.2956	E10	21.9812	-1.68559	3.21671	2.88567
E8	20.0925	E11	22.027	-1.93451	3.8225
E9	20.4774	E12	21.1714	-0.694038	1.61781
F7	21.8789	F10	22.2687	-0.389759	1.31017	1.20123
F8	21.8768	F11	22.2748	-0.397924	1.31761
F9	22.0049	F12	21.9697	0.035202	0.975895

## Sheet: Sheet2
描述
		个案数	平均值	标准 偏差	标准 错误	平均值的 95% 置信区间		最小值	最大值
						下限	上限
抗病	.00	3	0.350856	0.201832	0.116528	-0.150523	0.852236	0.232952	0.583907
	24.00	3	2.72884	0.549161	0.317058	1.36465	4.09303	2.37415	3.3614
	48.00	3	1.25195	0.368822	0.212939	0.335744	2.16815	0.872199	1.60877
	72.00	3	0.89377	0.121991	0.0704314	0.590729	1.19681	0.791804	1.02892
	96.00	3	2.96245	0.193743	0.111858	2.48116	3.44373	2.77087	3.15829
	120.00	3	0.411184	0.0718048	0.0414565	0.232811	0.589557	0.337945	0.481463
	总计	18	1.43317	1.10462	0.260361	0.88386	1.98249	0.232952	3.3614
感病	.00	3	0.786995	0.193645	0.111801	0.305954	1.26804	0.581339	0.965833
	24.00	3	0.709027	0.0676388	0.0390513	0.541003	0.877051	0.656237	0.785271
	48.00	3	0.760124	0.308539	0.178135	-0.00632839	1.52658	0.51705	1.10723
	72.00	3	1.11991	0.54348	0.313778	-0.230172	2.46999	0.518365	1.57554
	96.00	3	2.88567	1.13902	0.657611	0.0562005	5.71514	1.61781	3.8225
	120.00	3	1.20123	0.195178	0.112686	0.716377	1.68608	0.975895	1.31761
	总计	18	1.24383	0.902958	0.212829	0.794795	1.69286	0.51705	3.8225
多重比较
因变量				平均值差值 (I-J)	标准 错误	显著性	95% 置信区间
							下限	上限
抗病	LSD	.00	24.00	-2.37798*	0.244021	4.731e-07	-2.90966	-1.84631
			48.00	-.90109*	0.244021	0.00307668	-1.43277	-0.369415
			72.00	-.54291*	0.244021	0.0460343	-1.07459	-0.011237
			96.00	-2.61159*	0.244021	1.71192e-07	-3.14327	-2.07991
			120.00	-0.0603271	0.244021	0.808917	-0.592004	0.47135
		24.00	.00	2.37798*	0.244021	4.731e-07	1.84631	2.90966
			48.00	1.47689*	0.244021	5.73844e-05	0.945213	2.00857
			72.00	1.83507*	0.244021	7.04173e-06	1.30339	2.36675
			96.00	-0.233608	0.244021	0.357293	-0.765285	0.298069
			120.00	2.31766*	0.244021	6.23133e-07	1.78598	2.84933
		48.00	.00	.90109*	0.244021	0.00307668	0.369415	1.43277
			24.00	-1.47689*	0.244021	5.73844e-05	-2.00857	-0.945213
			72.00	0.358178	0.244021	0.167871	-0.173499	0.889855
			96.00	-1.71050*	0.244021	1.41516e-05	-2.24218	-1.17882
			120.00	.84077*	0.244021	0.00484543	0.309088	1.37244
		72.00	.00	.54291*	0.244021	0.0460343	0.011237	1.07459
			24.00	-1.83507*	0.244021	7.04173e-06	-2.36675	-1.30339
			48.00	-0.358178	0.244021	0.167871	-0.889855	0.173499
			96.00	-2.06868*	0.244021	2.06695e-06	-2.60035	-1.537
			120.00	0.482587	0.244021	0.0713975	-0.0490901	1.01426
		96.00	.00	2.61159*	0.244021	1.71192e-07	2.07991	3.14327
			24.00	0.233608	0.244021	0.357293	-0.298069	0.765285
			48.00	1.71050*	0.244021	1.41516e-05	1.17882	2.24218
			72.00	2.06868*	0.244021	2.06695e-06	1.537	2.60035
			120.00	2.55126*	0.244021	2.20961e-07	2.01959	3.08294
		120.00	.00	0.0603271	0.244021	0.808917	-0.47135	0.592004
			24.00	-2.31766*	0.244021	6.23133e-07	-2.84933	-1.78598
			48.00	-.84077*	0.244021	0.00484543	-1.37244	-0.309088
			72.00	-0.482587	0.244021	0.0713975	-1.01426	0.0490901
			96.00	-2.55126*	0.244021	2.20961e-07	-3.08294	-2.01959
感病	LSD	.00	24.00	0.0779682	0.443232	0.863299	-0.887751	1.04369
			48.00	0.0268715	0.443232	0.952655	-0.938848	0.992591
			72.00	-0.332912	0.443232	0.467067	-1.29863	0.632808
			96.00	-2.09868*	0.443232	0.000484431	-3.0644	-1.13296
			120.00	-0.414232	0.443232	0.368435	-1.37995	0.551488
		24.00	.00	-0.0779682	0.443232	0.863299	-1.04369	0.887751
			48.00	-0.0510967	0.443232	0.910128	-1.01682	0.914623
			72.00	-0.41088	0.443232	0.372191	-1.3766	0.554839
			96.00	-2.17664*	0.443232	0.000359306	-3.14236	-1.21093
			120.00	-0.4922	0.443232	0.288549	-1.45792	0.473519
		48.00	.00	-0.0268715	0.443232	0.952655	-0.992591	0.938848
			24.00	0.0510967	0.443232	0.910128	-0.914623	1.01682
			72.00	-0.359783	0.443232	0.432756	-1.3255	0.605936
			96.00	-2.12555*	0.443232	0.000436821	-3.09127	-1.15983
			120.00	-0.441103	0.443232	0.339285	-1.40682	0.524616
		72.00	.00	0.332912	0.443232	0.467067	-0.632808	1.29863
			24.00	0.41088	0.443232	0.372191	-0.554839	1.3766
			48.00	0.359783	0.443232	0.432756	-0.605936	1.3255
			96.00	-1.76576*	0.443232	0.0018137	-2.73148	-0.800045
			120.00	-0.0813201	0.443232	0.857492	-1.04704	0.884399
		96.00	.00	2.09868*	0.443232	0.000484431	1.13296	3.0644
			24.00	2.17664*	0.443232	0.000359306	1.21093	3.14236
			48.00	2.12555*	0.443232	0.000436821	1.15983	3.09127
			72.00	1.76576*	0.443232	0.0018137	0.800045	2.73148
			120.00	1.68444*	0.443232	0.00252811	0.718725	2.65016
		120.00	.00	0.414232	0.443232	0.368435	-0.551488	1.37995
			24.00	0.4922	0.443232	0.288549	-0.473519	1.45792
			48.00	0.441103	0.443232	0.339285	-0.524616	1.40682
			72.00	0.0813201	0.443232	0.857492	-0.884399	1.04704
			96.00	-1.68444*	0.443232	0.00252811	-2.65016	-0.718725
*. 平均值差值的显著性水平为 0.05。
抗病								感病
时间		个案数	Alpha 的子集 = 0.05					时间		个案数	Alpha 的子集 = 0.05
			1	2	3						1	2
邓肯a	.00	3	0.350856					邓肯a	24.00	3	0.709027
	120.00	3	0.411184						48.00	3	0.760124
	72.00	3	0.89377	0.89377					.00	3	0.786995
	48.00	3		1.25195					72.00	3	1.11991
	24.00	3			2.72884				120.00	3	1.20123
	96.00	3			2.96245				96.00	3		2.88567
	显著性		0.0550369	0.167871	0.357293				显著性		0.329748	1
将显示齐性子集中各个组的平均值。								将显示齐性子集中各个组的平均值。
a. 使用调和平均值样本大小 = 3.000。								a. 使用调和平均值样本大小 = 3.000。
