# Supplementary material for: TaPR1 Interacts With TaTLP1 via the αIV Helix to Be Involved in Wheat Defense to Puccinia triticina Through the CAPE1 Motif
Source: Front Plant Sci. 2022 May 26;13:874654. doi: 10.3389/fpls.2022.874654 (PMC9199852; doi:10.3389/fpls.2022.874654)
Supplement: Supplementary file 10 [file Data_Sheet_8.XLS]

## Sheet: Sheet1
SOD	GST	A1	29.747	E1	21.6554		8.09169	0.00366572	0.0048788
		A2	29.6864	E2	22.461		7.22536	0.00668268
		A3	29.5359	E3	21.6704		7.86547	0.00428801
		B1	28.874	F1	22.9952		5.8788	0.0169944	0.0129196			0	24	48	120
		B2	28.3792	F2	22.0737		6.30549	0.0126432			GST	0.0048788	0.0129196	0.00852734	0.0052171
		B3	28.9915	F3	22.2149		6.77658	0.00912105			TaPR1-4	0.0101611	0.0327571	0.0406615	0.019892
		C1	29.9305	G1	22.7361		7.19442	0.00682754	0.00852734		CAPE1	0.0100214	0.0316775	0.0402304	0.0193164
		C2	29.9352	G2	22.7495		7.18573	0.0068688			C△128-164-TaPR1-4	0.00838717	0.025512	0.0210366	0.0105024
		C3	29.7345	G3	23.3399		6.39463	0.0118857
		D1	29.998	H1	21.9208		8.07718	0.00370277	0.0052171
		D2	29.7856	H2	22.4186		7.36707	0.00605747
		D3	29.9524	H3	22.5451		7.40726	0.00589106
	TaPR1-4	A4	28.1181	E4	21.6436		6.47445	0.0112459	0.0101611
		A5	28.3608	E5	21.5546		6.80618	0.00893586
		A6	28.2621	E6	21.6611		6.60101	0.0103015
		B4	29.266	F4	23.9333		5.33277	0.0248129	0.0327571
		B5	28.5813	F5	24.1629		4.41841	0.0467655
		B6	29.1948	F6	23.9674		5.2274	0.0266929
		C4	28.2107	G4	24.0484		4.16234	0.0558483	0.0406615
		C5	28.712	G5	23.9405		4.77145	0.0366143
		C6	28.2662	G6	23.1841		5.08207	0.0295219
		D4	28.8789	H4	23.4962		5.38276	0.0239678	0.019892
		D5	28.726	H5	23.1271		5.59891	0.0206329
		D6	28.8794	H6	22.8277		6.05168	0.0150752
	C△128-164-TaPR1-4	A7	30.8794	E7	23.717		7.16234	0.00698105	0.00838717
		A8	30.9836	E8	23.4121		7.57152	0.0052571
		A9	30.0023	E9	23.7285		6.27387	0.0129234
		B7	28.991	F7	23.4763		5.51472	0.0218728	0.025512
		B8	29.1358	F8	23.5758		5.56002	0.0211967
		B9	29.0824	F9	24.1813		4.90114	0.0334665
		C7	28.294	G7	22.5946		5.69947	0.0192437	0.0210366
		C8	28.6097	G8	22.2358		6.37391	0.0120576
		C9	28.3615	G9	23.387		4.97445	0.0318084
		D7	28.0438	H7	20.7787		7.2651	0.0065011	0.0105024
		D8	27.3356	H8	20.9743		6.36125	0.0121639
		D9	27.2143	H9	20.9313		6.28296	0.0128423
	CAPE1	A10	28.8241	E10	22.0653		6.75876	0.00923444	0.0100214
		A11	28.8189	E11	22.4724		6.34647	0.0122891
		A12	28.9868	E12	22.1154		6.87144	0.00854064
		B10	28.7132	F10	23.9316		4.78162	0.0363571	0.0316775
		B11	28.4738	F11	23.8464		4.62739	0.0404592
		B12	28.8222	F12	23.0436		5.77863	0.0182163
		C10	29.4491	G10	24.973		4.47609	0.0449328	0.0402304
		C11	29.6184	G11	24.9971		4.62128	0.0406309
		C12	29.6058	G12	24.7745		4.83125	0.0351275
		D10	28.9617	H10	22.835		6.12664	0.0143119	0.0193164
		D11	28.9694	H11	22.8554		6.11399	0.0144379
		D12	28.0764	H12	22.9785		5.09792	0.0291993
