# Supplementary material for: TaPR1 Interacts With TaTLP1 via the αIV Helix to Be Involved in Wheat Defense to Puccinia triticina Through the CAPE1 Motif
Source: Front Plant Sci. 2022 May 26;13:874654. doi: 10.3389/fpls.2022.874654 (PMC9199852; doi:10.3389/fpls.2022.874654)
Supplement: Supplementary file 11 [file Data_Sheet_9.XLS]

## Sheet: Sheet1
A1	30.3832	E1	25.0188		5.36441	0.0242746	0.0192313	GST
A2	30.8277	E2	24.7347		6.09293	0.0146503
A3	30.9657	E3	25.2302		5.73549	0.0187692
B1	26.3228	F1	24.2841		2.03873	0.243377	0.29105
B2	25.921	F2	23.9202		2.00075	0.24987
B3	26.3223	F3	24.926		1.3963	0.379902
C1	27.5221	G1	25.0272		2.49498	0.177392	0.219205			0	24	48	120
C2	27.2027	G2	24.8575		2.34521	0.196799			GST	0.0192313	0.29105	0.219205	0.0759169
C3	27.2323	G3	25.4133		1.81897	0.283424			TaPR1-4	0.0154518	0.761802	0.513381	0.259869
D1	27.7343	H1	24.6762		3.05815	0.120062	0.0759169		CAPE1	0.0235121	0.710416	0.555659	0.258384
D2	27.6687	H2	24.2018		3.4669	0.0904395			C△128-164-TaPR1-4	0.0224567	0.582179	0.332985	0.168748
D3	30.1584	H3	24.301		5.85733	0.0172491
A4	30.4788	E4	25.0625		5.41629	0.0234171	0.0224567	C△128-164-TaPR1-4
A5	30.5079	E5	25.1271		5.38077	0.0240008
A6	30.7549	E6	25.1076		5.64732	0.0199521
B4	25.103	F4	24.4902		0.612833	0.653911	0.557241
B5	25.188	F5	24.0355		1.15247	0.449855
B6	25.2622	F6	24.4461		0.816146	0.567957
C4	25.8375	G4	24.1246		1.71293	0.305041	0.332985
C5	25.5742	G5	24.3022		1.272	0.414085
C6	25.9459	G6	24.1085		1.83738	0.279829
D4	25.4195	H4	22.2928		3.12671	0.11449	0.168748
D5	25.1335	H5	23.2548		1.87875	0.27192
D6	25.7185	H6	22.6576		3.06089	0.119834
A7	29.5267	E7	24.0255		5.50127	0.0220776	0.0235121	CAPE1
A8	29.9696	E8	24.912		5.05761	0.0300268
A9	29.7883	E9	24.0267		5.76165	0.0184319
B7	26.0669	F7	25.9807		0.0861721	0.942019	0.710416
B8	26.8624	F8	25.8982		0.964203	0.512561
B9	26.1055	F9	25.5421		0.563482	0.676667
C7	25.7966	G7	24.7794		1.01719	0.494077	0.555659
C8	25.5125	G8	24.5408		0.971691	0.509908
C9	25.5816	G9	24.9886		0.592939	0.662991
D7	26.6269	H7	24.6952		1.93167	0.262126	0.258384
D8	26.6184	H8	24.5983		2.02008	0.246544
D9	26.6469	H9	24.7391		1.90788	0.266483
A10	29.0482	E10	23.081		5.96721	0.0159843	0.0154518	TaPR1-4
A11	29.1524	E11	23.3885		5.76387	0.0184035
A12	29.8221	E12	23.4374		6.38471	0.0119677
B10	25.2429	F10	24.3074		0.935524	0.522853	0.761802
B11	25.167	F11	24.954		0.212977	0.862755
B12	25.0711	F12	24.9188		0.152326	0.899799
C10	25.2825	G10	24.5521		0.730408	0.602733	0.513381
C11	25.8855	G11	24.4834		1.40208	0.378384
C12	25.4903	G12	24.6513		0.839016	0.559025
D10	25.6025	H10	23.8994		1.70312	0.307121	0.259869
D11	25.8676	H11	23.513		2.3546	0.195521
D12	25.6174	H12	23.7652		1.85222	0.276966
