# Supplementary material for: TaPR1 Interacts With TaTLP1 via the αIV Helix to Be Involved in Wheat Defense to Puccinia triticina Through the CAPE1 Motif
Source: Front Plant Sci. 2022 May 26;13:874654. doi: 10.3389/fpls.2022.874654 (PMC9199852; doi:10.3389/fpls.2022.874654)
Supplement: Supplementary file 12 [file Data_Sheet_10.XLS]

## Sheet: Sheet1
A1	28.879	E1	24.917		3.96193	0.0641714	0.0771906	GST
A2	28.1978	E2	24.89		3.30785	0.10098
A3	28.5941	E3	24.6818		3.91224	0.0664201
B1	25.2083	F1	25.6037		-0.395401	1.31531	1.51263
B2	25.4083	F2	25.9702		-0.561852	1.47616
B3	25.0201	F3	25.8245		-0.804394	1.74641
C1	26.5479	G1	26.4777		0.0701885	0.952514	0.934228			0	24	48	120
C2	26.7428	G2	26.4036		0.339157	0.790503			GST	0.0771906	1.51263	0.934228	0.464973
C3	26.0785	G3	26.1621		-0.0836136	1.05967			TaPR1-4	0.141315	4.65709	3.36204	1.37944
D1	27.6962	H1	26.8916		0.804575	0.572531	0.464973		CAPE1	0.145557	4.44073	3.43328	1.40209
D2	27.9383	H2	26.6101		1.32816	0.398276			C△128-164-TaPR1-4	0.112628	3.68613	2.87006	0.746133
D3	27.9395	H3	26.702		1.23748	0.424113
A4	27.1665	E4	24.1071		3.05937	0.11996	0.112628	C△128-164-TaPR1-4
A5	27.2739	E5	24.1304		3.14352	0.113163
A6	27.3602	E6	24.1054		3.25483	0.104761
B4	22.1587	F4	24.3639		-2.2052	4.61138	3.68613
B5	22.5717	F5	24.2933		-1.72155	3.29791
B6	22.4637	F6	24.1186		-1.65494	3.1491
C4	22.5267	G4	24.1969		-1.67021	3.18261	2.87006
C5	22.2811	G5	23.7816		-1.50043	2.82927
C6	22.6097	G6	23.9873		-1.37757	2.5983
D4	23.5297	H4	22.028		1.50162	0.353156	0.746133
D5	23.7768	H5	23.1449		0.631874	0.645338
D6	23.0673	H6	23.3776		-0.310228	1.2399
A7	27.0182	E7	24.5975		2.42069	0.186766	0.145557	CAPE1
A8	27.9326	E8	24.6584		3.27411	0.10337
A9	27.6216	E9	24.851		2.77069	0.146534
B7	24.3183	F7	26.5271		-2.20878	4.62284	4.44073
B8	24.536	F8	26.142		-1.60602	3.04411
B9	24.4626	F9	26.9622		-2.49959	5.65524
C7	23.1679	G7	25.649		-2.48107	5.58311	3.43328
C8	23.929	G8	25.1156		-1.18652	2.27604
C9	23.7736	G9	25.0609		-1.2873	2.44071
D7	24.2299	H7	24.7694		-0.539476	1.45344	1.40209
D8	24.3261	H8	24.9194		-0.593304	1.5087
D9	24.4156	H9	24.7308		-0.315138	1.24413
A10	27.5189	E10	24.8092		2.70973	0.152859	0.141315	TaPR1-4
A11	27.8882	E11	24.6263		3.26192	0.104247
A12	27.1701	E12	24.5867		2.58346	0.166841
B10	23.9677	F10	26.0167		-2.049	4.13819	4.65709
B11	23.8375	F11	26.1045		-2.26701	4.81325
B12	23.858	F12	26.1857		-2.32764	5.01984
C10	23.9729	G10	25.2617		-1.28881	2.44326	3.36204
C11	23.6745	G11	25.16		-1.48553	2.80021
C12	23.2107	G12	25.4865		-2.2758	4.84265
D10	24.0713	H10	24.9001		-0.828822	1.77623	1.37944
D11	24.4026	H11	24.8303		-0.427668	1.34506
D12	24.5844	H12	24.6087		-0.0243683	1.01703
