# Supplementary material for: TaPR1 Interacts With TaTLP1 via the αIV Helix to Be Involved in Wheat Defense to Puccinia triticina Through the CAPE1 Motif
Source: Front Plant Sci. 2022 May 26;13:874654. doi: 10.3389/fpls.2022.874654 (PMC9199852; doi:10.3389/fpls.2022.874654)
Supplement: Supplementary file 13 [file Data_Sheet_11.XLSX]

## Sheet: Sheet1
TaPR1-4		N△25-64-TaPR1-4			C△119-164-TaPR1-4			C△128-164-TaPR1-4			Elution buffer			GST		Sterile water		CAPE1
41.46		21.95			109.92			29.35			1184.98			1119.35		105.53		531.38
43.56		29.18			120.08			40.38			1131.08			1139.72		105.69		131.51
44.38		42.23			122.38			43.05			1149.69			119.96		108.67		239.34
50.5		43.54			123.22			47.05			921.7			1411.85		123.88		139.92
53.6		46.61			123.85			59.6			1292.22			163.9		134.06		412.18
59.32		51.58			125.39			69.45			125.63			165.33		140.7		245.19
62.97		71.28			129.73			80.09			126.84			172.78		146.83		146.17
63.12		75.49			130.61			82.14			1027.7			178.71		149.09		154.08
64.37		75.84			131.85			84.67			528.88			181.75		163.09		58.85
64.38		83.46			136.23			87.14			130.09			186.64		163.47		59.62
66.67		83.61			137.61			88.24			1130.92			187.56		165.42		63.53
68.75		86.27			138.72			93.57			1134			190.49		166.2		66.85
70.03		91.98			139.34			98.6			141.56			192.17		172.36		69.51
70.21		92.3			139.98			98.79			143.71			1195		173.51		70.92
70.38		93.47			142.96			103.81			147.03			196.6		175.84		71.42
74.17		95.71			143.28			104.74			149.45			199.13		179.15		73.19
74.32		97.24			145.13			105.83			149.97			199.5		179.42		77.57
76.02		98.02			145.68			105.9			1150.7			293.63		180.13		78.62
76.3		103.17			145.84			108.43			151.08			203.99		182.02		79.42
80.03		107.28			148.88			110.93			155.1			204.58		185.4		84.13
89.04		107.34			154.2			116.02			167.42			205.58		189.32		85.09
90.64		108.76			154.63			116.24			169.38			218.85		189.39		86.49
91.85		109.3			155.07			116.57			173.62			226.52		192.4		90.04
93.76		111.9			158.29			117.07			174.45			227		192.7		90.06
96.63		113.94			158.7			120.71			175.77			244.28		194.98		91.06
96.65		115.99			159.01			121.97			177.54			245.58		200.31		96.29
97.03		116.68			160.51			123.51			178.41			245.77		202.71		96.96
98.4		118.27			164.31			123.89			185.58			246.63		204.37		108.13
99.05		120.26			164.36			127.67			188.76			246.72		209.77		108.46
101.3		122.79			165.61			127.68			190.9			250.29		211.94		112.28
102.02		122.86			166.44			131.91			198.27			251.4		215.72		116.19
102.04		124.2			167.06			132.97			202.79			252.41		218.42		116.68
104.58		124.75			167.67			133.04			202.95			258.17		218.87		116.88
108.25		125.73			169.6			133.96			207.69			262.12		222.36		117.02
109.46		125.75			171.42			135.68			210.45			265.42		223.3		117.44
110.73		127			174.1			135.97			213.69			271.93		225.68		117.96
110.96		128.45			175.01			139.03			214.96			273.99		226.12		118.1
111.52		128.69			175.92			141.2			215.64			274.82		227.8		120.18
112.51		128.73			176.19			142.63			224.92			283.38		228.41		131.49
118.34		128.94			177.38			143.45			225.05			286.56		228.79		131.6
118.99		129.15			179.97			144.29			227.17			288.29		230.87		132.35
119		129.28			180.37			144.92			230.86			288.64		232.78		141.61
119.04		130.66			180.98			145.53			231.36			290.6		232.9		142.39
120.11		132.61			184.02			149.66			241.01			295.62		234.37		147.07
122.29		132.82			185.6			150.86			250.45			296.99		237.53		147.51
123.19		135.99			187			152.49			250.77			297.28		248.29		148.97
125.66		136.08			187.27			153.32			251.4			301.59		256.17		149.97
125.66		136.19			187.8			154.28			254.49			303.41		256.47		157.25
126.28		137.08			188.42			154.71			257.26			311.33		256.92		158.95
126.31		139.03			190.46			158.83			258.83			311.82		258.63		165.71
126.48		141.49			191.53			159.52			259.33			318.85		264.49		166.12
126.7		142.22			192.29			161.52			1261.9			324.8		269.36		167.93
127.58		142.95			192.64			162.53			264.46			337.54		274.2		167.94
128.44		143.1			193.91			163.6			264.51			337.59		275.8		168.62
128.61		144.04			194.03			165.66			966.79			338.55		280.2		169.33
129.03		144.28			194.49			166.7			271.69			340.24		281.39		172.03
129.06		144.58			194.58			168.88			273.23			340.8		283.24		172.69
129.82		145.11			195.42			169.79			274.13			341.41		283.94		177.8
129.86		145.6			195.91			170.02			277.6			342.37		291.64		177.81
130.14		146.15			196.58			171.66			281.46			345.58		293.2		178.99
130.44		147.12			197.17			172.98			1083.6			348.16		295.35		180.26
131.53		148.01			199.25			174.58			283.89			1351.92		296.97		180.99
132.28		148.02			200.98			175.9			285.61			352.51		299.53		181.91
133.32		150.82			201.11			176.81			289.37			358.09		303.32		182.99
133.66		151.67			202.08			178.43			989.97			358.4		303.87		183.42
133.71		151.98			202.81			178.46			290.25			359.1		303.89		186.77
134.01		152.89			203.66			180.05			292.82			359.35		305.02		187.65
134.23		153.09			204.44			180.73			297.32			368.13		305.76		193.62
135.7		153.1			204.84			181.25			297.92			368.73		308.17		197.05
136.09		154.95			207.08			184.87			301.54			370.28		308.52		198.21
136.15		156.07			207.7			184.96			303.17			373.19		313.78		201.17
136.6		156.08			209.95			185.25			303.49			376.52		314.05		202.19
136.98		157.21			211.11			185.29			307.87			390.53		318		206.5
137.45		157.67			212.98			185.68			310			390.69		320.23		207.02
138.12		158.14			215.8			186.31			311.6			391.96		320.47		210.06
138.24		158.78			216.01			186.44			315.7			392.59		324.44		213.13
138.62		159.89			217.45			188.04			316.96			394.4		326.78		214.07
138.72		160.49			218.31			188.1			320.15			398.96		332.4		216.74
138.79		160.66			219.53			188.25			323.41			401.54		337.4		216.96
140.27		161.04			220.29			188.69			324.62			406.14		338.72		217.61
140.94		161.33			222.65			189.66			325			406.14		343.65		218.35
141.17		161.36			224.41			192.38			325.62			407.13		344.84		218.87
141.28		162.47			224.83			193.81			326.13			408.17		346.83		221.34
142.37		162.65			226.55			195.41			327.85			409.01		353.76		221.97
142.73		162.77			228.77			195.66			328.6			411.8		356.09		224.18
143.03		163.56			229.39			196.45			332.16			411.97		357.97		226.83
146.05		164.82			229.76			196.59			337.99			414.34		359.59		227.77
146.43		164.87			230.26			197.32			341.56			417.1		360.89		228.64
146.78		166.15			230.61			198.54			343.29			417.94		362.02		233.6
147.28		166.42			230.85			200.35			345.24			418.18		366.51		236.95
147.34		167.3			230.92			201.23			347.16			423.41		372.79		238.01
147.48		167.67			233.12			205.12			347.41			423.64		374.87		239.19
147.5		168.01			234.46			205.4			349.38			424.17		375.89		239.23
148.21		168.26			235.39			205.41			358.06			426.63		380.81		243.93
148.31		168.4			235.39			205.68			361.85			430.19		388.15		244.6
149.18		172.82			235.54			208.49			364.29			433.45		391.23		247.04
149.2		173.75			237.46			208.62			365.08			438.67		391.54		247.2
149.28		173.9			238.07			209.99			369.62			441.23		392.46		250.65
150.44		174.19			238.35			211.23			374.6			444.56		392.53		251.86
150.73		177.12			242.87			212.99			377.07			451.61		393.39		258.45
154.77		177.2			243			214.34			377.77			460.82		396		262.35
154.92		177.21			243.17			219.29			378.81			461.44		396.64		262.82
156.84		177.24			244.75			221.06			382.8			465.1		402.2		263.89
159.82		178.7			245.18			221.71			386.25			465.35		402.85		264.9
160.32		179.26			245.96			222.38			389.69			469.52		404.59		269.45
160.48		180.2			246.47			222.47			392.04			470.98		407.98		269.62
161.3		181.85			251.01			223.99			392.18			476.29		421.14		270.32
161.38		184.55			251.32			225.64			394.27			486.19		422.7		276.71
162.54		185.16			254.62			226.17			394.92			487.68		423.83		280.7
162.67		186.83			255.57			227.3			398.56			489.21		424.13		281.03
163.37		188.09			255.93			227.83			398.85			493.17		432.31		284.87
163.4		188.32			256.8			228.28			403.25			497.75		437.72		286.57
164.22		188.5			258.86			228.63			406.21			507.3		438.87		287.08
165.1		188.68			259.12			229.34			413.25			508.3		440.13		289.27
165.73		189.97			260.15			230.09			414.23			510		442.93		289.78
166.17		190.49			260.4			233.08			416.26			510.57		446.24		294.03
167.63		190.83			262.35			233.21			425.95			512.12		449.9		296.38
167.74		191.38			262.57			235.55			429.27			518.05		451.51		296.74
168.79		191.89			263.38			235.74			436.38			521.47		453.58		298.68
169.38		191.93			263.82			237.05			446.72			523.02		460.8		302.06
171.11		193.18			263.85			238.64			453.88			524.65		462.88		303.26
172.03		193.62			266.36			240.86			455.7			526.51		463.48		305.43
172.66		193.87			268.74			240.97			458.55			527		464.47		307.22
173.55		194.46			270.91			241.92			461.41			527.12		474.31		314.45
173.65		194.58			272.16			245.06			461.49			527.72		474.51		315.3
174.56		195.06			272.35			245.76			462.44			529.06		479.53		318.61
174.95		195.96			273.07			249.64			468.52			530.85		480.07		318.68
177.99		196.26			273.53			251.06			470.27			531.72		480.95		320.32
178.43		196.82			273.65			252.58			472.01			533.78		487.95		321.9
178.55		197.29			274.38			254.23			472.28			534.1		492.18		326.43
178.81		197.42			276.64			256.38			474.76			534.79		493.96		334.13
180.13		198.16			276.98			258.91			474.89			535.36		496.88		342.42
181.17		199.52			278.41			260.22			475.59			535.59		499.97		343.93
183.26		201.77			279.22			261.31			480.68			555.08		505.85		348.79
184.27		202.64			279.82			267.71			483.25			555.09		508.66		353.29
185.48		204.28			280.52			270.31			483.83			557.8		508.89		354.63
186.47		205.41			282.49			271.67			485.85			566.68		509.54		358.16
187.68		205.97			283.53			273.9			494.71			574.9		513.67		358.51
188.08		206.03			284.8			275.14			496.07			1582		516.45		359.31
188.7		206.24			287.13			276.74			496.35			583.82		519.94		361.28
189.14		206.46			289.65			276.84			501.75			588.27		522.63		367.16
189.26		206.67			289.74			279.24			506.2			588.33		522.69		367.91
189.69		208.4			290.62			279.83			510.17			593.24		523.55		370.83
190.37		210.27			290.63			279.93			510.26			594.21		524.56		373.29
190.62		210.46			293.88			284			517.64			595.29		524.6		374.38
192.1		210.52			297.53			286.09			518.38			596.29		525.18		376.02
192.97		210.71			299			287.54			524.2			600.98		532.42		376.86
193.41		211.66			300.09			289.96			524.35			607.26		538.04		387.08
194.83		212.43			300.29			293.12			531.81			607.92		539.37		387.94
195.48		212.75			303.64			293.32			537.27			609.2		539.95		388.74
196.17		212.93			309.34			293.47			539.5			699.91		546.15		390.75
197.51		214.33			311.62			293.62			545.74			617.56		561.57		400.57
199.04		215.69			312.96			293.88			550.58			619.76		566.64		404.64
199.63		217.4			313.55			295.82			554.17			649.97		567.95		409.45
199.85		219.14			313.97			296.17			556.33			665.88		570.1		412.38
200.15		221.11			321.95			298.85			556.67			667.67		572.74		415.96
200.75		221.87			322.98			300.46			559.44			671.34		577.41		416.99
204.01		223.12			325.6			301.93			560.43			672.85		577.74		420.66
204.27		223.33			325.64			303.22			568			883.19		581.51		424.3
205.06		224.4			325.95			304.82			576.06			684.13		587.45		428.1
205.09		224.64			326.13			305.21			576.36			688.65		591.81		428.59
206.59		224.72			326.14			306.13			576.56			688.91		596.95		431.21
207.5		226.11			326.58			313.78			577.47			889.41		599.52		436.91
208.35		226.45			327.11			314.55			585.35			702.39		601.18		440.52
209.38		227.04			329.12			314.79			585.8			707.43		601.38		444.11
209.57		227.88			330.68			314.88			592.12			707.87		606.34		445.19
210.33		228.42			332.4			315.85			596.87			721.36		611.69		458.91
210.96		229.46			332.83			317.82			603.32			724.19		615.47		464.23
211.31		232.15			336.28			320.23			616.28			726.14		615.99		483.69
214.07		233.39			336.59			321.19			617.95			737.46		617.08		484.09
214.34		234.25			337.18			325.85			621.12			754.87		618.06		498.38
214.97		234.75			338.24			327.37			622.11			763.52		625.59		514.51
216.42		235.08			339.74			327.75			627.81			790.56		626.73		522.83
216.6		237.27			339.87			327.88			643.25			981		628.07		524.14
216.9		238.44			341.33			327.9			647.83			786.08		632.28		534.14
216.93		239.15			341.87			328.39			655.27			786.73		634.3		573.59
217.8		240.62			342.22			331.12			668.29			795.51		640.44		581.3
217.81		241.01			342.31			333.1			675.3			864.91		640.99		592.98
218.46		241.3			342.7			333.17			682.17			980.71		646.17		594.67
219.1		241.59			345.6			333.76			683.79			987.63		651.05		597.17
220.3		242.17			350.12			334.94			692.13			480.947		652.98		603.94
222.73		242.21			350.42			338.56			1054.73					654.42		607.2
223.09		243.01			350.71			342.98			695.79					654.95		624.05
224.04		243.28			352.23			343.46			700.51					655.79		729.43
225.76		244.61			354.61			344.67			711.22					657.37		839.87
227.5		245.6			355.14			346.32			722.39					658.01		873.01
231.01		246.99			356.05			347.73			736.36					659.23		950.68
232.56		249.43			357.42			349.09			738.64					662.44
232.92		249.67			358.44			350.93			1940.86					663.71		280.195
233.12		250.26			358.95			354.03			742.56					665.31
233.34		250.44			359.41			355.56			756.69					665.48
233.83		251.67			361.74			356.04			767.81					666.24
234.16		254.84			362.31			358.38			1169.2					667.24
234.8		255.44			363.37			359.08			771.6					668.37
235.28		256.38			364.72			365.12			777.07					672.86
235.44		256.68			365.49			365.85			789.41					673.41
236.22		257.43			366.95			367.35			825.36					675.99
237.54		258.14			368.03			376.03			830.06					677.71
239.65		258.51			368.23			376.37			947.18					679.06
239.92		258.74			371.2			378.98			949.97					679.52
240.17		259.4			372.95			379.3			977.85					682.59
240.34		260.09			377.99			381.61			1018.97					688.61
240.67		261.72			380.4			382.04			482.163					690.13
240.68		262.5			381.57			382.63								690.22
241.04		262.81			384.95			382.98								691.03
243.77		267.04			386.39			383.19								697
243.89		267.31			386.67			384.24								709.91
244.12		268.3			386.97			385.06								712.69
244.14		269.01			389.22			387.14								712.97
245.29		269.5			389.43			389.28								715.02
246.15		272.99			389.62			389.67								722.8
246.35		273.69			391.44			391.42								730.71
246.92		273.74			392.55			391.56								732.24
247.49		274.08			393.25			393.69								733.22
247.52		274.82			395.69			398.29								737.19
250.78		274.91			397.54			400.1								737.42
251.07		275.32			256.714			400.22								741.28
252.04		275.34			401.29			402.75								742.14
252.09		275.65			402.64			403.3								742.31
253.23		275.72			402.91			403.69								749.34
253.99		275.84			406.49			405.7								751.61
254.4		277.24			406.91			406.19								755.12
255.43		278.71			410.75			411.71								762.61
256.39		278.83			411.56			413.6								771.31
257.37		279.79			411.63			415.44								804.71
257.76		281.86			412.78			418.18								805.32
258.96		282.36			419.07			418.77								808.53
259.13		282.61			423.81			422.42								812.66
259.75		283.7			439.26			424.62								817.1
260.37		284.43			439.91			426.27								820.5
261.27		284.56			442.97			426.42								827.1
261.63		284.66			443.01			431.78								830.02
262.54		286.85			443.09			434.38								832.26
264.26		288.46			444.08			436.57								833.86
264.56		288.67			449.86			437.79								843.71
267.56		289.69			453.18			439.02								865.14
267.68		292.18			455.55			441.82								874.7
268.66		292.55			458.93			442.73								882.28
269.24		292.8			461.06			443.01								889.26
269.42		293.88			461.71			443.31								921.92
269.69		296.38			463.22			445.21								926.1
270.17		296.71			465.41			447.76								926.96
270.84		298.56			466.84			449.98								940.47
272.38		299.05			473.7			450.33								982.28
273.02		301.19			474.57			450.36								1083.2
275.04		301.33			476.03			453.56								1096.27
277.43		301.47			477.44			454.57								1105.81
277.54		302.07			479.21			455.33								482.923
277.69		302.28			481.61			457.12
278.72		302.56			485.01			457.66
279.94		302.61			499.97			460.08
283.65		302.81			502.29			461.13
283.73		303.97			503.8			464.14
283.95		304.3			504.32			465.92
284.37		304.36			505.5			476.83
285.14		306.24			506.21			477.35
285.74		308.68			508.66			477.98
286.23		309.12			510.81			479.93
287.17		309.56			510.98			481.19
290.43		310.39			511.61			481.4
291.17		311.29			513.75			482.48
292.46		311.38			519.69			482.62
293.09		311.78			525.1			483.54
293.73		315.23			530.46			487.51
296.09		316.83			533.45			488.75
297.26		317.07			534.65			493.21
298.12		317.2			537.37			493.23
300.29		317.83			541.74			495.97
300.8		319.6			542.35			496.25
301.31		320.29			543.18			498.16
302.68		320.78			543.71			499.66
302.7		321.69			545.16			500.02
302.85		323.47			545.17			502.32
305.67		323.89			545.24			503.91
307.28		324.09			550.52			505.58
307.79		324.22			552.27			506.94
307.82		325.89			555.57			508.04
307.92		326.93			556.26			508.62
311.35		328.07			556.72			509.67
312		328.59			557.64			510.71
312.18		329.54			558.35			511.88
314.59		331.39			559.93			516.13
315.17		333.87			562.65			518.14
315.39		333.99			565.47			520.29
317.74		334.1			567.24			526.23
318.27		334.33			568.93			526.46
319.64		335.05			570.17			530.66
320.19		335.88			572.88			532.76
322.3		336.13			574.17			533.27
325.26		336.22			577.39			533.82
327.53		337.02			577.99			545.77
327.55		338.46			578.15			546.49
327.81		338.97			579.28			552.12
328.93		339.64			579.98			553.72
329.57		339.81			580.99			553.99
329.67		341.33			581.13			554.75
330.18		341.59			581.47			554.85
330.2		342.32			582.49			561.01
331.15		342.35			583.45			561.98
333.07		343.11			584.28			562.76
335.4		343.64			585.36			564.11
335.58		344.5			601.72			568.62
337.1		346.33			606.32			571.03
337.74		346.73			607.92			571.75
338.22		347.97			610.43			578.56
339.54		348.17			610.55			580.9
339.95		350.54			613.83			582.18
341.24		353.44			622.88			585.42
344.59		354.04			624.21			585.66
345.06		354.58			628.85			589.62
346.59		354.84			630.19			592.91
348.68		355.59			639.76			595.25
351.67		359.18			640.02			595.83
353.51		360.19			642.15			597.55
554.15		360.28			642.24			603.25
355.43		362.64			645.29			607.75
358.47		364.3			648.99			610.69
363.36		366.27			652.99			613.35
364.3		366.87			657.21			617.34
365.78		368.33			665.25			624.02
366.47		369.82			687.01			624.18
366.53		370.93			691.55			624.71
368.4		372.6			694.39			629.2
370.36		372.92			695.69			632.44
371.86		373.43			699.15			632.71
372.21		375.6			699.55			635.9
373.71		375.98			703.5			640.4
376.56		378.33			707.26			641.41
377.73		378.74			709.28			641.49
378.01		380.33			728.72			642.39
379.59		382.39			739.85			645.72
380.17		383.91			740.15			646.56
380.29		384.34			744.33			647.39
380.35		385.07			748.8			651.17
384.18		385.65			781.83			651.17
386		387.62			793.51			651.62
386.38		391.57			795.61			652.73
388.43		393.16			801.06			654.53
390.64		393.28			804.97			658.66
392.38		395.81			808.08			662.75
392.5		397.44			817.56			663.7
395.09		398.53			851.12			665.52
395.24		400.98			882.25			668.75
396.15		401.05			886.97			674.97
398.63		401.86			889.78			675.75
398.88		404.68			890.09			679.77
403.85		405.47			899.65			685.62
405.02		405.61			916.72			693.54
405.45		407.68			944.26			700.64
409.15		408.44			981.15			702.43
412.21		408.79			1238.16			707.6
418.03		409.11			1238.63			711.24
418.59		415.08			1348.35			721.29
422.25		417.24			1669.4			721.7
425.43		419.09			1816.4			723.14
427.36		425.44			398.18			723.76
427.52		428.52						737.14
427.97		433.01						738.4
428.82		433.35						743.1
429.05		435.9						749.99
429.98		437.24						753.06
431.62		440.08						753.32
434.45		440.16						764.2
436.86		441.6						765.83
437.79		442.78						765.97
438.17		443.82						772.83
438.63		444.52						774.38
479.59		446.68						775.77
441.33		447.4						777.84
446.92		448.08						789.14
453.95		449.65						805.19
454.14		453.08						850.3
454.29		453.81						893.34
460.25		454.66						893.56
465.82		455.55						924.99
466.94		456.32						925.77
471.72		456.74						955.34
471.82		463.28						990.65
472.16		464.88						994.45
882.7		467.58						1031.26
485.45		471.67						1058.38
495.07		475.42						1059.63
498.64		477.1						1112.93
583.12		477.66						1114.47
503.62		480.87						1153.61
506.75		482.2						1154.09
510.29		487.66						396.085
510.42		488.56
510.77		493
511.3		494.52
512.24		494.73
513.8		499.62
515.43		502.19
517.69		505.73
529.78		507.78
530.02		507.82
534.57		509.29
536.76		513.46
541.55		515.97
544.23		516.94
844.69		518.49
547.79		518.61
550.47		520.19
553.2		521.09
555.28		523.85
558.75		524.09
563.77		526.54
565.66		527.52
566.56		530.71
573.42		532.18
974.37		532.8
577.82		535.15
577.96		546.42
580.38		547.05
580.68		548.74
581.44		549.04
582.29		550.53
586.71		552.79
588.89		562.47
592.2		565
796.54		565.81
607.75		568.51
910.07		571.58
611.23		571.88
619.86		576.79
624.75		586.12
672.93		587.43
647.57		588.9
647.88		591.1
647.94		591.47
649.37		596.25
773.53		596.52
691.64		598.8
706.16		600.66
978.01		602.76
		603.5
		608.44
		609.29
		609.84
		613.52
		617.1
		638.74
		641.02
		642.72
		656.84
		672.24
		674.84
		678.25
		678.4
		693.97
		696.87
		698.61
		704.96
		721.28
		736.92
		741.01
		755.64
		766.1
		776.03
		799.19
		807.79
		825.68
		846.92
		315.429
287.131

## Sheet: Sheet3
描述
VAR00002
	个案数	平均值	标准 偏差	标准 错误	平均值的 95% 置信区间		最小值	最大值
					下限	上限					Elution buffer	Sterile water	GST	C△128-164-TaPR1-4	C△119-164-TaPR1-4	N△25-64-TaPR1-4	TaPR1-4	CAPE1
1.00	435	287.131	163.898	7.85829	271.686	302.576	41.46	978.01			482.2	482.9	480.9	396.1	398.2	315.4	287.1	280.2
4.00	187	280.195	160.424	11.7314	257.051	303.339	58.85	950.68			19.5828	14.1509	17.8088	11.4565	12.2147	7.56876	7.85829	11.7314
10.00	202	482.163	278.325	19.5828	443.549	520.778	125.63	1940.86
100.00	180	480.947	238.929	17.8088	445.805	516.089	119.96	1582
118.00	355	398.18	230.143	12.2147	374.158	422.203	109.92	1816.4
142.00	463	315.429	162.86	7.56876	300.555	330.302	21.95	846.92
384.00	386	396.085	225.084	11.4565	373.56	418.61	29.35	1154.09
1000.00	247	482.923	222.398	14.1509	455.051	510.795	105.53	1105.81
总计	2455	375.085	220.369	4.44759	366.364	383.807	21.95	1940.86
VAR00002
VAR00001		个案数	Alpha 的子集 = 0.05
			1	2	3
邓肯a,b	4.00	187	280.195			CAPE1
	1.00	435	287.131			TaPR1-4
	142.00	463	315.429			N△25-64-TaPR1-4
	384.00	386		396.085		C△128-164-TaPR1-4
	118.00	355		398.18		C△119-164-TaPR1-4
	100.00	180			480.947	GST
	10.00	202			482.163	Elution buffer
	1000.00	247			482.923	Sterile water
	显著性		0.061521	0.906632	0.917998
将显示齐性子集中各个组的平均值。
a. 使用调和平均值样本大小 = 268.741。
b. 组大小不相等。使用了组大小的调和平均值。无法保证 I 类误差级别。
