# Supplementary material for: TaPR1 Interacts With TaTLP1 via the αIV Helix to Be Involved in Wheat Defense to Puccinia triticina Through the CAPE1 Motif
Source: Front Plant Sci. 2022 May 26;13:874654. doi: 10.3389/fpls.2022.874654 (PMC9199852; doi:10.3389/fpls.2022.874654)
Supplement: Supplementary file 14 [file Data_Sheet_12.XLSX]

## Sheet: TaPR1-4
Number of germinated spores	Number of ungerminated spores	Germination rate (%)
5	0	5	1	100
10	2	8	0.8	80
11	3	8	0.727273	72.7273
12	4	8	0.666667	66.6667
17	2	15	0.882353	88.2353
17	2	15	0.882353	88.2353
18	3	15	0.833333	83.3333
19	5	14	0.736842	73.6842
20	9	11	0.55	55
21	4	17	0.809524	80.9524
23	4	19	0.826087	82.6087
24	4	20	0.833333	83.3333
25	6	19	0.76	76
27	15	12	0.444444	44.4444
28	2	26	0.928571	92.8571
30	4	26	0.866667	86.6667
31	6	25	0.806452	80.6452
32	3	29	0.90625	90.625
33	4	29	0.878788	87.8788
33	2	31	0.939394	93.9394
34	3	31	0.911765	91.1765
37	6	31	0.837838	83.7838
40	8	32	0.8	80
40	7	33	0.825	82.5
41	5	36	0.878049	87.8049
42	5	37	0.880952	88.0952
43	7	36	0.837209	83.7209
44	4	40	0.909091	90.9091
46	6	40	0.869565	86.9565
48	6	42	0.875	87.5
51	7	44	0.862745	86.2745
59	5	54	0.915254	91.5254
		25.25	0.827525

## Sheet: C△119-164-TaPR1-4
Number of germinated spores	Number of ungerminated spores	Germination rate (%)
17	1	16	0.941176	94.1176
18	4	14	0.777778	77.7778
19	4	15	0.789474	78.9474
20	2	18	0.9	90
21	3	18	0.857143	85.7143
22	6	16	0.727273	72.7273
22	2	20	0.909091	90.9091
24	1	23	0.958333	95.8333
25	6	19	0.76	76
25	3	22	0.88	88
26	6	20	0.769231	76.9231
28	2	26	0.928571	92.8571
29	2	27	0.931034	93.1034
29	1	28	0.965517	96.5517
30	0	30	1	100
31	1	30	0.967742	96.7742
31	0	31	1	100
33	3	30	0.909091	90.9091
33	6	27	0.818182	81.8182
35	5	30	0.857143	85.7143
36	3	33	0.916667	91.6667
37	3	34	0.918919	91.8919
37	3	34	0.918919	91.8919
40	4	36	0.9	90
41	2	39	0.95122	95.122
43	6	37	0.860465	86.0465
45	2	43	0.955556	95.5556
45	5	40	0.888889	88.8889
47	1	46	0.978723	97.8723
48	2	46	0.958333	95.8333
49	0	49	1	100
50	2	48	0.96	96
51	4	47	0.921569	92.1569
52	3	49	0.942308	94.2308
34	3	31	0.911765	91.1765
21	7	14	0.666667	66.6667
22	8	14	0.636364	63.6364
		29.7297	0.890085

## Sheet: N△25-64-TaPR1-4
13	2	11	0.846154	84.6154
13	2	11	0.846154	84.6154
15	5	10	0.666667	66.6667
15	7	8	0.533333	53.3333
16	3	13	0.8125	81.25
16	3	13	0.8125	81.25
17	3	14	0.823529	82.3529
18	8	10	0.555556	55.5556
19	5	14	0.736842	73.6842
20	6	14	0.7	70
23	6	17	0.73913	73.913
23	1	22	0.956522	95.6522
24	2	22	0.916667	91.6667
27	2	25	0.925926	92.5926
28	6	22	0.785714	78.5714
Number of germinated spores	Number of ungerminated spores	Germination rate (%)
29	13	16	0.551724	55.1724
30	3	27	0.9	90
31	5	26	0.83871	83.871
34	0	34	1	100
34	11	23	0.676471	67.6471
35	1	34	0.971429	97.1429
37	3	34	0.918919	91.8919
38	0	38	1	100
38	1	37	0.973684	97.3684
39	6	33	0.846154	84.6154
41	2	39	0.95122	95.122
42	12	30	0.714286	71.4286
42	3	39	0.928571	92.8571
44	1	43	0.977273	97.7273
44	2	42	0.954545	95.4545
47	4	43	0.914894	91.4894
47	9	38	0.808511	80.8511
		25.0625	0.830737

## Sheet: C△128-164-TaPR1-4
7	0	7	1	100
18	3	15	0.833333	83.3333
19	0	19	1	100
20	4	16	0.8	80
21	0	21	1	100
22	0	22	1	100
24	1	23	0.958333	95.8333
25	4	21	0.84	84
25	0	25	1	100
26	1	25	0.961538	96.1538
27	4	23	0.851852	85.1852
29	1	28	0.965517	96.5517
30	1	29	0.966667	96.6667
31	7	24	0.774194	77.4194
31	1	30	0.967742	96.7742
34	5	29	0.852941	85.2941
34	3	31	0.911765	91.1765
21	4	17	0.809524	80.9524
38	5	33	0.868421	86.8421
33	3	30	0.909091	90.9091
42	6	36	0.857143	85.7143
Number of germinated spores	Number of ungerminated spores	Germination rate (%)
32	6	26	0.8125	81.25
43	1	42	0.976744	97.6744
33	3	30	0.909091	90.9091
22	0	22	1	100
45	2	43	0.955556	95.5556
45	0	45	1	100
47	2	45	0.957447	95.7447
47	1	46	0.978723	97.8723
48	2	46	0.958333	95.8333
49	1	48	0.979592	97.9592
50	0	50	1	100
51	6	45	0.882353	88.2353
54	1	53	0.981481	98.1481
23	2	21	0.913043	91.3043
20	5	15	0.75	75
22	7	15	0.681818	68.1818
		29.6216	0.915263

## Sheet: Elution buffer
Number of germinated spores	Number of ungerminated spores	Germination rate (%)
4	0	4	1	100
7	0	7	1	100
10	0	10	1	100
10	0	10	1	100
14	1	13	0.928571	92.8571
16	0	16	1	100
19	0	19	1	100
22	3	19	0.863636	86.3636
22	0	22	1	100
24	0	24	1	100
26	1	25	0.961538	96.1538
27	3	24	0.888889	88.8889
32	3	29	0.90625	90.625
33	4	29	0.878788	87.8788
35	0	35	1	100
36	2	34	0.944444	94.4444
37	2	35	0.945946	94.5946
40	3	37	0.925	92.5
41	7	34	0.829268	82.9268
43	7	36	0.837209	83.7209
52	9	43	0.826923	82.6923
		24.0476	0.939832

## Sheet: GST
Number of germinated spores	Number of ungerminated spores	Germination rate (%)
7	1	6	0.857143	85.7143
10	1	9	0.9	90
12	1	11	0.916667	91.6667
14	3	11	0.785714	78.5714
19	1	18	0.947368	94.7368
20	2	18	0.9	90
21	0	21	1	100
22	2	20	0.909091	90.9091
27	1	26	0.962963	96.2963
29	0	29	1	100
31	0	31	1	100
32	0	32	1	100
34	1	33	0.970588	97.0588
38	1	37	0.973684	97.3684
40	5	35	0.875	87.5
40	0	40	1	100
41	1	40	0.97561	97.561
50	2	48	0.96	96
		25.8333	0.940768

## Sheet: Sterile water
Number of germinated spores	Number of ungerminated spores	Germination rate (%)
5	2	3	0.6	60
8	1	7	0.875	87.5
9	1	8	0.888889	88.8889
20	0	20	1	100
21	1	20	0.952381	95.2381
22	4	18	0.818182	81.8182
26	3	23	0.884615	88.4615
28	1	27	0.964286	96.4286
29	1	28	0.965517	96.5517
30	1	29	0.966667	96.6667
30	2	28	0.933333	93.3333
31	2	29	0.935484	93.5484
33	1	32	0.969697	96.9697
34	0	34	1	100
36	0	36	1	100
37	0	37	1	100
37	0	37	1	100
40	1	39	0.975	97.5
42	4	38	0.904762	90.4762
44	3	41	0.931818	93.1818
49	3	46	0.938776	93.8776
50	0	50	1	100
53	8	45	0.849057	84.9057
		29.3478	0.928411

## Sheet: CAPE1
Number of germinated spores	Number of ungerminated spores	Germination rate (%)
40	2	38	95
67	3	64	95.5224
40	3	37	92.5
16	5	11	68.75
22	2	20	90.9091
21	5	16	76.1905
18	6	12	66.6667
48	5	43	89.5833
37	2	35	94.5946
26	4	22	84.6154
22	5	17	77.2727
22	2	20	90.9091
35	5	30	85.7143
21	6	15	71.4286
30	6	24	80
31	9	22	70.9677
11	7	4	36.3636
31	2	29	93.5484
26	3	23	88.4615
30	5	25	83.3333
22	3	19	86.3636
35	1	34	97.1429
30	2	28	93.3333
27	7	20	74.0741
32	9	23	71.875
			82.2048

## Sheet: Sheet3
描述
VAR00002
	个案数	平均值	标准 偏差	标准 错误	平均值的 95% 置信区间		最小值	最大值
					下限	上限				Elution buffer	Sterile water	GST	C△128-164-TaPR1-4	C△119-164-TaPR1-4	N△25-64-TaPR1-4	TaPR1-4	CAPE1
1.00	32	82.7525	11.0131	1.94687	78.7818	86.7232	44.4444	100		93.9832	92.8411	94.0768	91.5263	89.0085	83.0737	82.7525	82.2048
4.00	25	82.2048	13.4822	2.69645	76.6396	87.77	36.3636	97.1429		1.39913	1.84752	1.42232	1.38285	1.48738	2.36523	1.94687	2.69645
10.00	21	93.9832	6.41161	1.39913	91.0646	96.9017	82.6923	100
100.00	18	94.0768	6.03439	1.42232	91.076	97.0777	78.5714	100
118.00	37	89.0085	9.04735	1.48738	85.992	92.025	63.6364	100
142.00	32	83.0737	13.3797	2.36523	78.2498	87.8976	53.3333	100
384.00	37	91.5263	8.41156	1.38285	88.7218	94.3309	68.1818	100
1000.00	23	92.8411	8.86037	1.84752	89.0096	96.6727	60	100
总计	225	88.1943	11.0349	0.735662	86.7446	89.644	36.3636	100
VAR00002
VAR00001		个案数	Alpha 的子集 = 0.05
			1	2
邓肯a,b	4.00	25	82.2048		CAPE1
	1.00	32	82.7525		PR1
	142.00	32	83.0737		N△25-64-TaPR1-4
	118.00	37		89.0085	C△119-164-TaPR1-4
	384.00	37		91.5263	C△128-164-TaPR1-4
	1000.00	23		92.8411	water
	10.00	21		93.9832	Elution buffer
	100.00	18		94.0768	GST
	显著性		0.772117	0.108321
将显示齐性子集中各个组的平均值。
a. 使用调和平均值样本大小 = 26.385。
b. 组大小不相等。使用了组大小的调和平均值。无法保证 I 类误差级别。
