# Supplementary material for: TaPR1 Interacts With TaTLP1 via the αIV Helix to Be Involved in Wheat Defense to Puccinia triticina Through the CAPE1 Motif
Source: Front Plant Sci. 2022 May 26;13:874654. doi: 10.3389/fpls.2022.874654 (PMC9199852; doi:10.3389/fpls.2022.874654)
Supplement: Supplementary file 15 [file Data_Sheet_13.XLSX]

## Sheet: Sheet2
48	WT	GST	PR1	CAPE1	TB		OE	GST	PR1	CAPE1	TB
		212.964	431.256	471.01	342.964			582.888	617.133	690.794	557.949
		215.756	415.735	481.973	305.756			515.98	640.156	699.242	523.623
		292.746	409.09	482	332.746			499.889	609.112	684.748	539.281
120	WT	GST	PR1	CAPE1	TB		OE	GST	PR1	CAPE1	TB
		712.993	840.076	844.681	786.726			900.109	1178.73	1198.95	935.336
		719.582	859.604	853.882	794.397			910.9	1415.93	1335.66	1005.83
		700.354	875.567	893.642	794.993			928.195	1416.13	1387.74	998.967
