# Supplementary material for: TaPR1 Interacts With TaTLP1 via the αIV Helix to Be Involved in Wheat Defense to Puccinia triticina Through the CAPE1 Motif
Source: Front Plant Sci. 2022 May 26;13:874654. doi: 10.3389/fpls.2022.874654 (PMC9199852; doi:10.3389/fpls.2022.874654)
Supplement: Supplementary file 16 [file Data_Sheet_14.XLSX]

## Sheet:  necrotic areas 
		WT				OE
GST	4.479	3.563	4.111		117.842	124.517	119.881
TaPR1-4	40.891	50.057	50.908		158.997	196.123	197.337
CAPE1	58.094	58.748	43.734		153.475	185.51	192.727
CΔ128-164-TaPR1-4	30.541	30.664	28.522		116.474	138.336	156.814

## Sheet: infection areas 
48		WT				OE
GST	82.862	83.286	90.893		55.561	59.777	61.965
TaPR1-4	32.601	38.589	42.293		26.737	28.711	29.188
CAPE1	39.775	40.97	35.478		22.973	29.511	26.388
CΔ128-164-TaPR1-4	63.233	65.234	67.897		42.683	43.181	47.535
120		WT				OE
GST	557.287	479.184	490.287		292.324	313.513	302.989
TaPR1-4	309.275	307.675	291.557		203.13	210.765	200.276
CAPE1	263.082	365.039	300.369		200.584	219.38	190.404
CΔ128-164-TaPR1-4	484.709	391.722	368.224		254.709	297.479	258.195
